# Supplementary material
Source: PubMed Central journal article supplement (PMC2501108)
Supplement: NIHMS56277-supplement-1.pdf [file NIHMS56277-supplement-1.pdf]

## SUPPORTING INFORMATION

## 'Concerted' Transition State, Stepwise Mechanism.

Dynamics Effects in C<sup>2</sup>-C<sup>6</sup> Enyne Allene

## Cyclizations

Tefsit Bekele,<sup>‡</sup> Chad F. Christian,<sup>†</sup> Mark A. Lipton,<sup>\*‡</sup> and Daniel A.Singleton<sup>\*†</sup>*Department of Chemistry, Purdue University**West Lafayette, Indiana 47907**Department of Chemistry, Texas A&M University, PO Box 30012,**College Station, Texas 77842*

lipton@purdue.edu, singleton@mail.chem.tamu.edu

## Table of Contents

|                                                                                                     |    |
|-----------------------------------------------------------------------------------------------------|----|
| Kinetic Data and Simulations .....                                                                  | 2  |
| Theoretical Results .....                                                                           | 6  |
| Structure 9, starting material, RB3LYP/6-31G(d,p) .....                                             | 7  |
| Structure 10 (ene product), RB3LYP/6-31G(d,p) .....                                                 | 8  |
| Structure 11 (ene transition structure), RB3LYP/6-31G(d,p) .....                                    | 10 |
| Structure 11 (ene transition structure), UBPW91/6-31G(d,p) .....                                    | 11 |
| Structure 12 (diradical), UB3LYP/6-31G(d,p) .....                                                   | 13 |
| Structure 13 (ts from diradical to product), UB3LYP/6-31G(d,p) .....                                | 14 |
| Structure 14 (ts for reversed diradical formation), UB3LYP/6-31G(d,p) .....                         | 16 |
| Restricted Analog of Structure 14 (ts for reversed diradical formation),<br>RB3LYP/6-31G(d,p) ..... | 17 |
| Structure 15 (reversed diradical), UB3LYP/6-31G(d,p) .....                                          | 18 |
| Structure 16, model starting material, RB3LYP/6-311+G(d,p) .....                                    | 19 |
| Structure 17 (model ene transition structure), RB3LYP/6-311+G(d,p) .....                            | 20 |
| Structure 17 (model ene transition structure), MP2/6-31G(d,p) .....                                 | 20 |
| Structure 18 (model ene product), RB3LYP/6-311+G(d,p) .....                                         | 21 |
| Structure 19 (model diradical), UB3LYP/6-311+G(d,p) .....                                           | 22 |
| Restricted Analog of Structure 19 (model diradical), B3LYP/6-311+G(d,p) ...                         | 22 |
| Structure 20 (model ts from diradical to product), UB3LYP/6-311+G(d,p) ....                         | 23 |
| Restricted Analog of Structure 20 (model ts from diradical to product),<br>B3LYP/6-311+G(d,p) ..... | 24 |
| Structure 16, model starting material, RB3LYP/6-31G(d,p) .....                                      | 24 |
| Structure 17 (model ene transition structure), RB3LYP/6-31G(d,p) .....                              | 25 |
| Structure 18 (model ene product), RB3LYP/6-31G(d,p) .....                                           | 26 |
| Structure 19 (model diradical), UB3LYP/6-31G(d,p) .....                                             | 26 |
| Restricted Analog of Structure 19 (model diradical), B3LYP/6-31G(d,p) .....                         | 27 |
| Structure 20 (model ts from diradical to product), UB3LYP/6-31G(d,p) .....                          | 28 |
| Restricted Analog of Structure 20 (model ts from diradical to product),<br>B3LYP/6-31G(d,p) .....   | 28 |
| Full System Energies, (U)B3LYP/6-31G** .....                                                        | 29 |
| Model System Energies .....                                                                         | 30 |

## Kinetic Data and Simulations

The graph below shows a plot of experimental starting material peak size observations versus time for paired reactions of **9a** versus **9b**, set A. A  $k_H$  of  $10.2 \times 10^{-5}$  and a  $k_D$  of  $6.7 \times 10^{-5}$ , with an overall  $k_H/k_D$  of 1.52, were assigned based on a least-squares fit of the data versus the simulation. Approximate error limits of  $\pm 1.0 \times 10^{-5}$  for  $k_H$  and  $\pm 0.8 \times 10^{-5}$  for  $k_D$  were assigned visually, that is, rate constants outside of the error range exhibited an obviously worse fit to the curvature of the experimental data (the time=0 peak height was used as a second adjustable parameter in such simulations, but no adjustments with rate constants outside of the error range led to an acceptable fit).

Slightly better fits could be obtained if were assumed that a trace unknown impurity was underneath the observed peaks, contributing 0.002 to the peak height. However, this did not significantly affect the best-fit isotope effect. The absence of a time = infinity observation is a deficiency in this study but the resulting increased uncertainty in the isotope effect does not impact its interpretation in the present context.

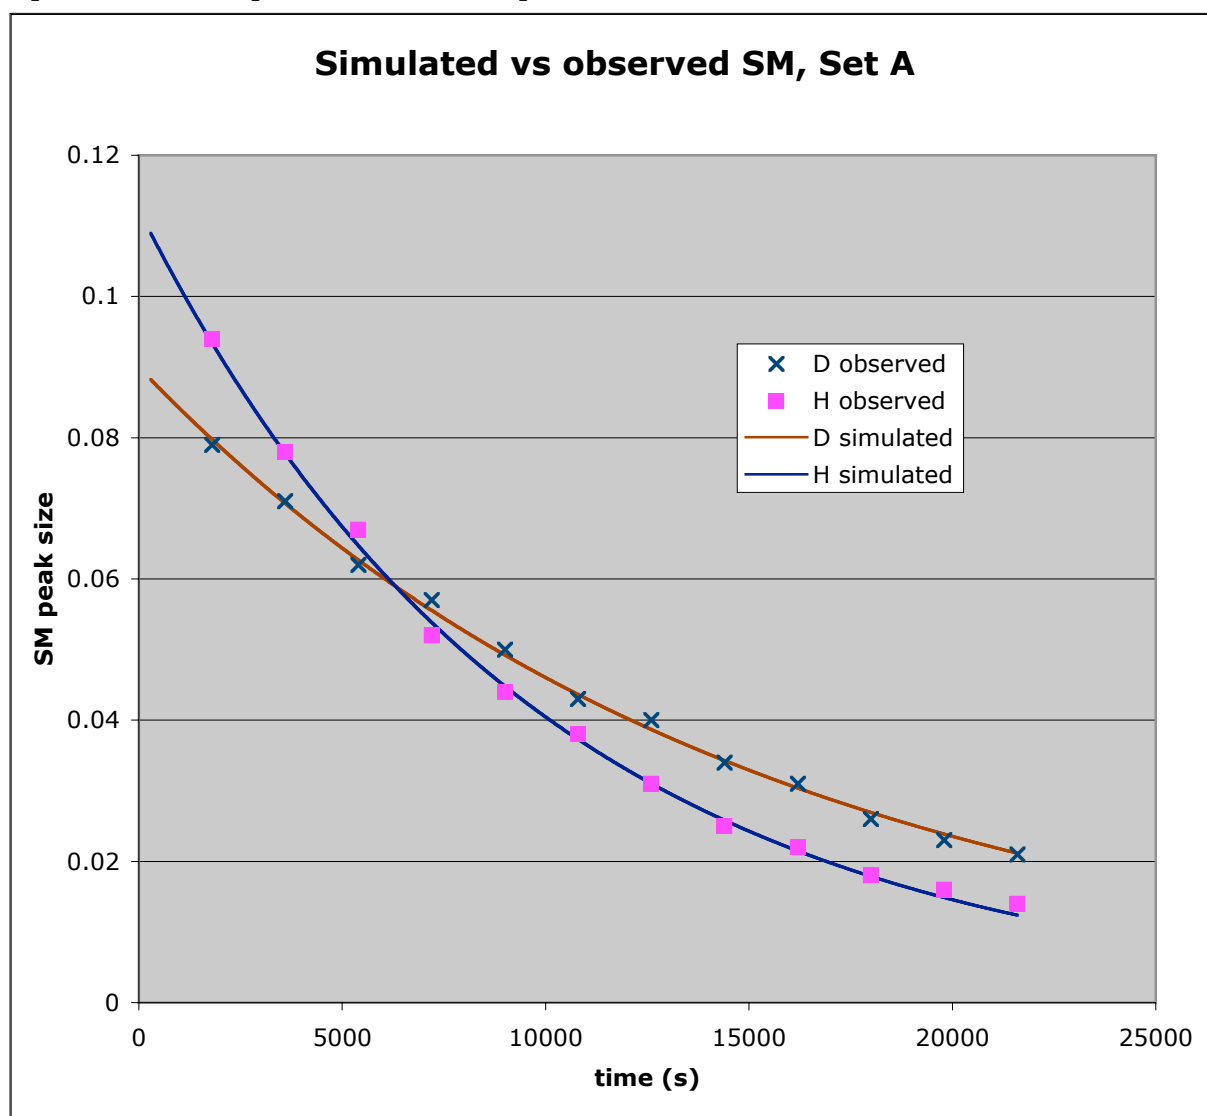

The graph below shows a plot of experimental starting material peak size observations versus time for paired reactions of **9a** versus **9b**, set B. A  $k_H$  of  $9.3 \times 10^{-5}$  and a  $k_D$  of  $6.2 \times 10^{-5}$ , with an overall  $k_H/k_D$  of 1.50, were assigned based on a least-squares fit of the data versus the simulation. Approximate error limits of  $\pm 1.4 \times 10^{-5}$  for  $k_H$  and  $\pm 0.8 \times 10^{-5}$  for  $k_D$  were assigned visually, that is, rate constants outside of the error range exhibited an obviously worse fit to the curvature of the experimental data (the time=0 peak height was used as a second adjustable parameter in such simulations, but no adjustments with rate constants outside of the error range led to an acceptable fit).

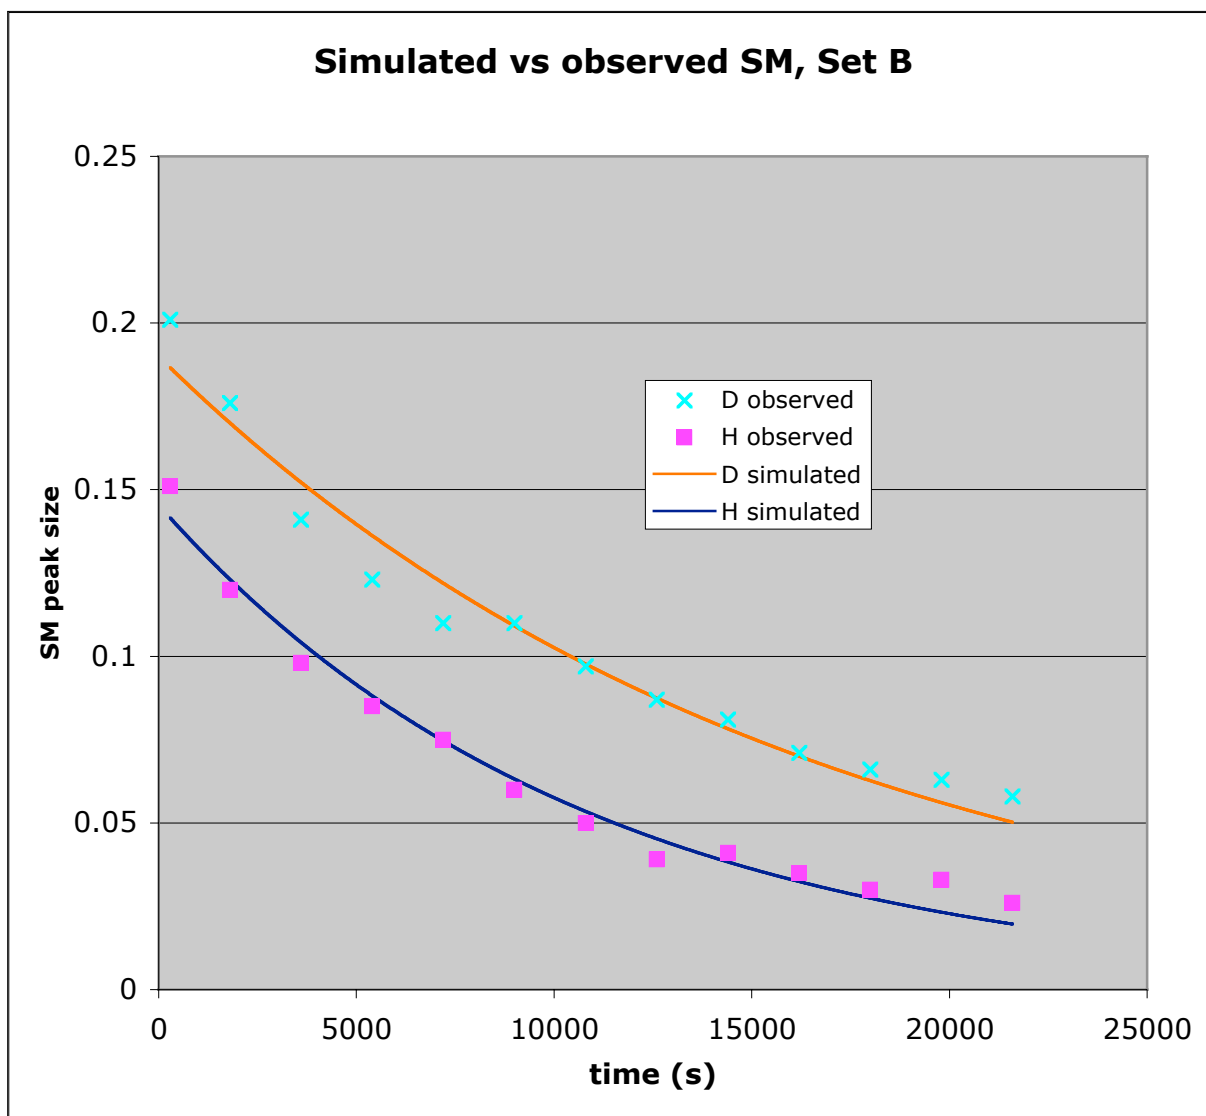

The graph below shows a plot of experimental product peak size observations versus time for paired reactions of **9a** versus **9b**, set A. A  $k_H$  of  $1.0 \times 10^{-5}$  and a  $k_D$  of  $6.8 \times 10^{-5}$ , with an overall  $k_H/k_D$  of 1.46, were assigned based on a least-squares fit of the data versus the simulation. Approximate error limits of  $\pm 1.5 \times 10^{-5}$  for  $k_H$  and  $\pm 1.3 \times 10^{-5}$  for  $k_D$  were assigned visually, that is, rate constants outside of the error range exhibited an obviously worse fit to the curvature of the experimental data (the time=0 peak height was used as a second adjustable parameter in such simulations, but no adjustments with rate constants outside of the error range led to an acceptable fit).

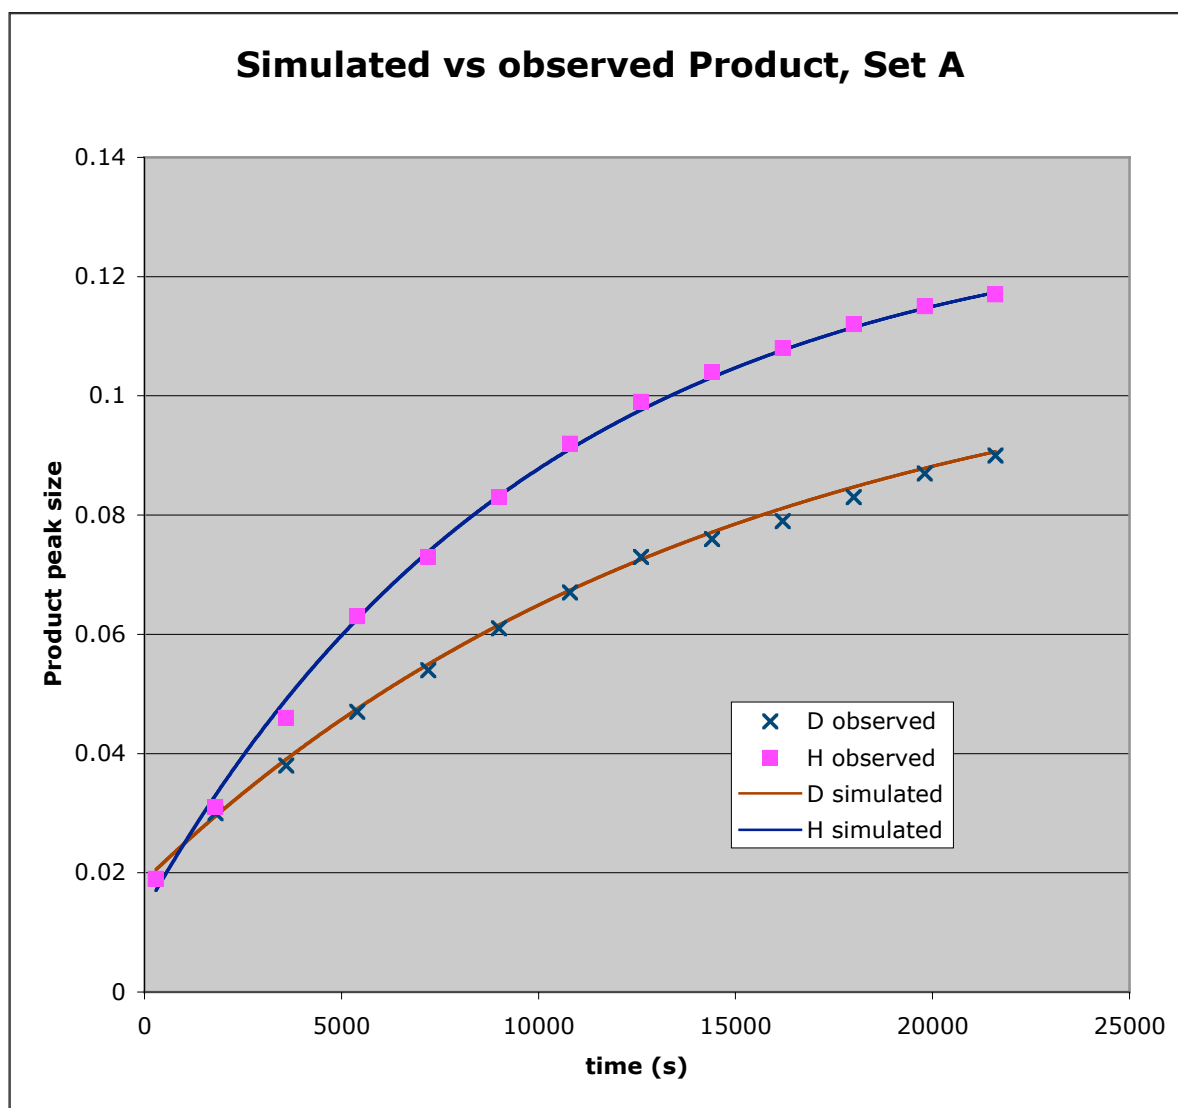

The graph below shows a plot of experimental product peak size observations versus time for paired reactions of **9a** versus **9b**, set B. A  $k_H$  of  $11.5 \times 10^{-5}$  and a  $k_D$  of  $9.2 \times 10^{-5}$ , with an overall  $k_H/k_D$  of 1.25, were assigned based on a least-squares fit of the data versus the simulation. Approximate error limits of  $\pm 2.5 \times 10^{-5}$  for  $k_H$  and  $\pm 1.8 \times 10^{-5}$  for  $k_D$  were assigned visually, that is, rate constants outside of the error range exhibited an obviously worse fit to the curvature of the experimental data (the time=0 peak height was used as a second adjustable parameter in such simulations, but no adjustments with rate constants outside of the error range led to an acceptable fit).

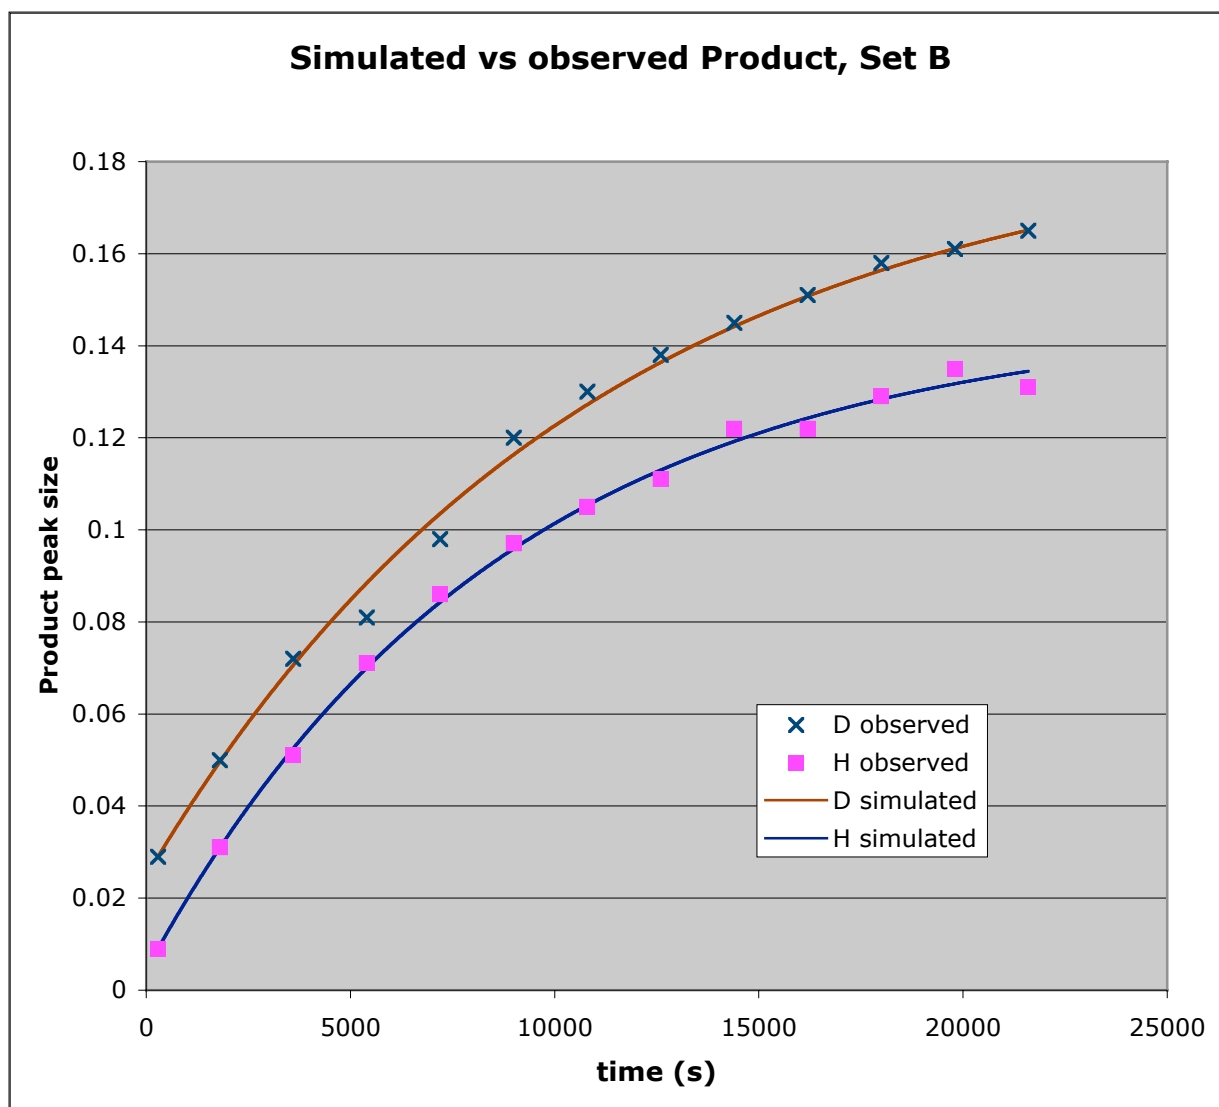

## Theoretical Results

All structures and energies were obtained using standard procedures in Gaussian98<sup>1</sup> or Gaussian03.<sup>2</sup> Vibrational frequency analyses were carried out on all stationary points.

The program used for dynamics was described in Supporting Information for a previous publication.<sup>3</sup> The latest version of this program may be obtained for free by emailing D. Singleton: singleton@mail.chem.tamu.edu

1. Gaussian 98, Revision A.11.3, M. J. Frisch, G. W. Trucks, H. B. Schlegel, G. E. Scuseria, M. A. Robb, J. R. Cheeseman, V. G. Zakrzewski, J. A. Montgomery, Jr., R. E. Stratmann, J. C. Burant, S. Dapprich, J. M. Millam, A. D. Daniels, K. N. Kudin, M. C. Strain, O. Farkas, J. Tomasi, V. Barone, M. Cossi, R. Cammi, B. Mennucci, C. Pomelli, C. Adamo, S. Clifford, J. Ochterski, G. A. Petersson, P. Y. Ayala, Q. Cui, K. Morokuma, N. Rega, P. Salvador, J. J. Dannenberg, D. K. Malick, A. D. Rabuck, K. Raghavachari, J. B. Foresman, J. Cioslowski, J. V. Ortiz, A. G. Baboul, B. B. Stefanov, G. Liu, A. Liashenko, P. Piskorz, I. Komaromi, R. Gomperts, R. L. Martin, D. J. Fox, T. Keith, M. A. Al-Laham, C. Y. Peng, A. Nanayakkara, M. Challacombe, P. M. W. Gill, B. Johnson, W. Chen, M. W. Wong, J. L. Andres, C. Gonzalez, M. Head-Gordon, E. S. Replogle, and J. A. Pople, Gaussian, Inc., Pittsburgh PA, 2002.
2. Gaussian 03, Revision C.02, M. J. Frisch, G. W. Trucks, H. B. Schlegel, G. E. Scuseria, M. A. Robb, J. R. Cheeseman, J. A. Montgomery, Jr., T. Vreven, K. N. Kudin, J. C. Burant, J. M. Millam, S. S. Iyengar, J. Tomasi, V. Barone, B. Mennucci, M. Cossi, G. Scalmani, N. Rega, G. A. Petersson, H. Nakatsuji, M. Hada, M. Ehara, K. Toyota, R. Fukuda, J. Hasegawa, M. Ishida, T. Nakajima, Y. Honda, O. Kitao, H. Nakai, M. Klene, X. Li, J. E. Knox, H. P. Hratchian, J. B. Cross, C. Adamo, J. Jaramillo, R. Gomperts, R. E. Stratmann, O. Yazyev, A. J. Austin, R. Cammi, C. Pomelli, J. W. Ochterski, P. Y. Ayala, K. Morokuma, G. A. Voth, P. Salvador, J. J. Dannenberg, V. G. Zakrzewski, S. Dapprich, A. D. Daniels, M. C. Strain, O. Farkas, D. K. Malick, A. D. Rabuck, K. Raghavachari, J. B. Foresman, J. V. Ortiz, Q. Cui, A. G. Baboul, S. Clifford, J. Cioslowski, B. B. Stefanov, G. Liu, A. Liashenko, P. Piskorz, I. Komaromi, R. L. Martin, D. J. Fox, T. Keith, M. A. Al-Laham, C. Y. Peng, A. Nanayakkara, M. Challacombe, P. M. W. Gill, B. Johnson, W. Chen, M. W. Wong, C. Gonzalez, and J. A. Pople, Gaussian, Inc., Wallingford CT, 2004.
3. Singleton, D. A.; Hang, C.; Szymanski, M. J.; Greenwald, E. E. *J. Am. Chem. Soc.* **2003**, *125*, 1176–1177.

**Structure 9, starting material, RB3LYP/6-31G(d,p)**

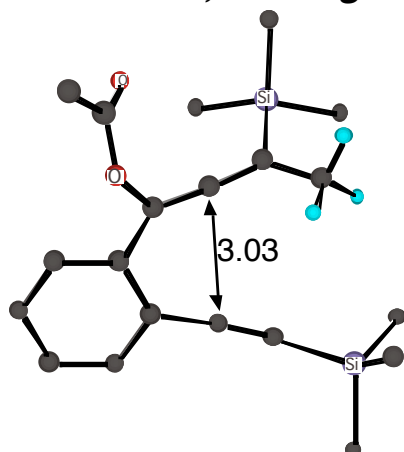

(some hydrogens removed for clarity)

E(RB+HF-LYP) = -1508.47276852

|                                              |                             |
|----------------------------------------------|-----------------------------|
| Zero-point correction=                       | 0.421576 (Hartree/Particle) |
| Thermal correction to Energy=                | 0.453560                    |
| Thermal correction to Enthalpy=              | 0.454504                    |
| Thermal correction to Gibbs Free Energy=     | 0.355897                    |
| Sum of electronic and zero-point Energies=   | -1508.051192                |
| Sum of electronic and thermal Energies=      | -1508.019209                |
| Sum of electronic and thermal Enthalpies=    | -1508.018264                |
| Sum of electronic and thermal Free Energies= | -1508.116872                |

|       | E (Thermal) | CV             | S              |
|-------|-------------|----------------|----------------|
|       | KCAL/MOL    | CAL/MOL-KELVIN | CAL/MOL-KELVIN |
| TOTAL | 284.613     | 113.716        | 207.536        |

```

C,0,-2.381237053,3.8838974659,0.8784074189
C,0,-1.1139896079,4.394352073,1.1646422089
C,0,0.0087178244,3.6333532255,0.8661173775
C,0,-0.0999639271,2.3524772398,0.2853216257
C,0,-1.3915867486,1.8219137792,0.0168904489
C,0,-2.5101189914,2.620689041,0.3113634075
C,0,1.126968058,1.6919640061,-0.0311280471
C,0,2.2517597976,1.2748865583,-0.2678913809
Si,0,3.9874711281,0.7597197133,-0.5919329434
C,0,-1.6117159588,0.4784812084,-0.5471703868
O,0,-2.83777568,0.3819338562,-1.2658908838
C,0,-0.8269237868,-0.5774647564,-0.4717212409
C,0,-0.1514492732,-1.6905548896,-0.3692993334
Si,0,-0.4940825427,-2.8288997709,1.1338213691
C,0,-1.590934547,-4.2593477488,0.5611642383
C,0,0.8803274976,-2.1000904202,-1.4064212001
C,0,1.1746732275,-3.4996081059,1.7339226752
C,0,-1.3314230918,-1.8483546376,2.5056910565
C,0,4.1513610487,0.1720431702,-2.3804725239
C,0,4.4654858131,-0.6250714264,0.6029427901
C,0,5.1059709855,2.2572322487,-0.3085098877
H,0,1.8677317308,-2.2096405217,-0.9449242989
H,0,0.9548645679,-1.3686028947,-2.2143595893
H,0,0.6214881608,-3.0735197041,-1.840145936
C,0,-3.750460547,-0.5811498215,-0.9523738952

```

```

H,0,-3.497370418,2.2334521166,0.0911384228
H,0,-3.2706222086,4.4668324381,1.098637561
H,0,1.002578174,4.0207653569,1.0636789282
H,0,-1.0009146497,5.3788686821,1.6078695373
H,0,-1.7564587909,-4.9715533126,1.377715673
H,0,-2.5641810772,-3.8777156518,0.2387977372
H,0,-1.1437223322,-4.8114974055,-0.2725728025
H,0,-1.5395950211,-2.4904723579,3.3689822147
H,0,-0.7016045388,-1.0202965629,2.8467978726
H,0,-2.2776505455,-1.4359771272,2.1465004011
H,0,1.0317126338,-4.1362793821,2.6145448093
H,0,1.6759792548,-4.1050301207,0.9711264264
H,0,1.8530276441,-2.6888096295,2.0205047619
H,0,6.1561504282,1.9959604944,-0.481914884
H,0,4.8482630911,3.0774992118,-0.98608054
H,0,5.0189144685,2.6305589199,0.7169093993
H,0,5.5016678338,-0.9410294031,0.4361118891
H,0,4.3806970522,-0.2922907544,1.6425049699
H,0,3.8247899935,-1.5042760609,0.4818784485
H,0,5.1864804237,-0.1146031614,-2.5987188231
H,0,3.5144993407,-0.6951169701,-2.5799157629
H,0,3.8682630796,0.9630179039,-3.0823553315
O,0,-3.640945492,-1.3763416571,-0.0489460096
C,0,-4.9145389043,-0.5074590035,-1.9119100644
H,0,-5.3187835871,0.5077527276,-1.9470135023
H,0,-4.5738557702,-0.7566825722,-2.9215252409
H,0,-5.6855506495,-1.2106662822,-1.5993068752

```

**Structure 10 (ene product), RB3LYP/6-31G(d,p)**

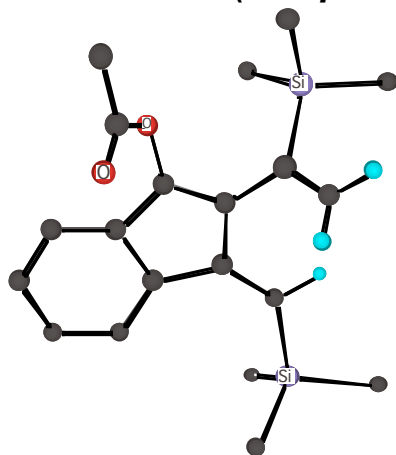

(most hydrogens removed for clarity)

E(RB+HF-LYP) = -1508.52060319

|                                              |                             |
|----------------------------------------------|-----------------------------|
| Zero-point correction=                       | 0.424179 (Hartree/Particle) |
| Thermal correction to Energy=                | 0.454476                    |
| Thermal correction to Enthalpy=              | 0.455420                    |
| Thermal correction to Gibbs Free Energy=     | 0.361547                    |
| Sum of electronic and zero-point Energies=   | -1508.096424                |
| Sum of electronic and thermal Energies=      | -1508.066127                |
| Sum of electronic and thermal Enthalpies=    | -1508.065183                |
| Sum of electronic and thermal Free Energies= | -1508.159056                |

E (Thermal)

CV

S



| TOTAL                                         | KCAL/MOL<br>285.188 | CAL/MOL-KELVIN<br>110.412 | CAL/MOL-KELVIN<br>197.572 |
|-----------------------------------------------|---------------------|---------------------------|---------------------------|
| C,0,0.802706903,-3.8579444049,1.524104052     |                     |                           |                           |
| C,0,-0.5766901022,-4.0421499814,1.4110003259  |                     |                           |                           |
| C,0,-1.3852852048,-3.0427982366,0.85967805    |                     |                           |                           |
| C,0,-0.7833242367,-1.865257522,0.4292858414   |                     |                           |                           |
| C,0,0.6126131712,-1.6638533505,0.5438827869   |                     |                           |                           |
| C,0,1.4037877491,-2.667963252,1.0924613064    |                     |                           |                           |
| C,0,-1.3410470906,-0.6543328004,-0.1653530045 |                     |                           |                           |
| O,0,-2.6992313737,-0.4424587385,-0.3566064295 |                     |                           |                           |
| C,0,0.9268752682,-0.3090021379,0.0167157249   |                     |                           |                           |
| C,0,2.1072239861,0.350371811,-0.0540639135    |                     |                           |                           |
| Si,0,3.891286891,-0.0686400449,0.4098675664   |                     |                           |                           |
| C,0,-0.3813403607,0.2699927943,-0.424561927   |                     |                           |                           |
| C,0,-0.5679176752,1.623144751,-0.9892765831   |                     |                           |                           |
| C,0,0.0683093552,1.971054167,-2.1229545622    |                     |                           |                           |
| Si,0,-1.646778472,2.9149965902,-0.0800768442  |                     |                           |                           |
| C,0,-3.3110579804,3.1265727847,-0.9593216449  |                     |                           |                           |
| C,0,-0.7313323207,4.5742741406,-0.1013218634  |                     |                           |                           |
| C,0,-1.9277547211,2.3706021371,1.7062293459   |                     |                           |                           |
| C,0,4.5533709361,-1.5382778209,-0.5868473592  |                     |                           |                           |
| C,0,4.0828198974,-0.3533502029,2.2744197744   |                     |                           |                           |
| C,0,4.9047786469,1.4608571756,-0.0565726303   |                     |                           |                           |
| C,0,-3.3529089846,-1.206987531,-1.2989935818  |                     |                           |                           |
| O,0,-2.8038101834,-2.0292338757,-1.9855249117 |                     |                           |                           |
| C,0,-4.8154214006,-0.8433478096,-1.3368522678 |                     |                           |                           |
| H,0,1.4189916506,-4.6440052039,1.9499384217   |                     |                           |                           |
| H,0,-1.0264450054,-4.9702491387,1.7512384139  |                     |                           |                           |
| H,0,-2.4563287609,-3.1892132713,0.7670971234  |                     |                           |                           |
| H,0,2.4752699267,-2.548239529,1.1910045313    |                     |                           |                           |
| H,0,2.015483434,1.3540417141,-0.4755729192    |                     |                           |                           |
| H,0,-0.0188509172,2.9680174499,-2.548816177   |                     |                           |                           |
| H,0,0.6869381625,1.2699602618,-2.6799696581   |                     |                           |                           |
| H,0,-3.9025102353,3.9188749254,-0.4862894369  |                     |                           |                           |
| H,0,-3.1751805761,3.3948675522,-2.012286246   |                     |                           |                           |
| H,0,-3.8951167279,2.202571003,-0.9186456169   |                     |                           |                           |
| H,0,-1.3158196375,5.3421227292,0.4182993856   |                     |                           |                           |
| H,0,0.2398560759,4.4994534552,0.3987091862    |                     |                           |                           |
| H,0,-0.5533388845,4.9338680905,-1.1202429947  |                     |                           |                           |
| H,0,-2.5070042122,3.1236143408,2.2522519724   |                     |                           |                           |
| H,0,-2.478959715,1.426648554,1.7484644802     |                     |                           |                           |
| H,0,-0.9808978015,2.2292287721,2.2377974417   |                     |                           |                           |
| H,0,5.592866195,-1.7484190904,-0.3095293734   |                     |                           |                           |
| H,0,3.975874461,-2.45522017,-0.4422624962     |                     |                           |                           |
| H,0,4.5372438118,-1.3075959676,-1.6574562697  |                     |                           |                           |
| H,0,5.1274276072,-0.5773680239,2.5198263857   |                     |                           |                           |
| H,0,3.8002328919,0.5494666326,2.826533389     |                     |                           |                           |
| H,0,3.4664745116,-1.1735103108,2.6519183189   |                     |                           |                           |
| H,0,5.9640587722,1.319017405,0.1840396882     |                     |                           |                           |
| H,0,4.8356130688,1.6749986523,-1.1287721911   |                     |                           |                           |
| H,0,4.5603200901,2.3501975995,0.4826401889    |                     |                           |                           |
| H,0,-5.23099601,-0.8075661013,-0.326924031    |                     |                           |                           |
| H,0,-4.9338836181,0.151382505,-1.7781918994   |                     |                           |                           |
| H,0,-5.3505389795,-1.572023825,-1.9447662194  |                     |                           |                           |

**Structure 11 (ene transition structure), RB3LYP/6-31G(d,p)**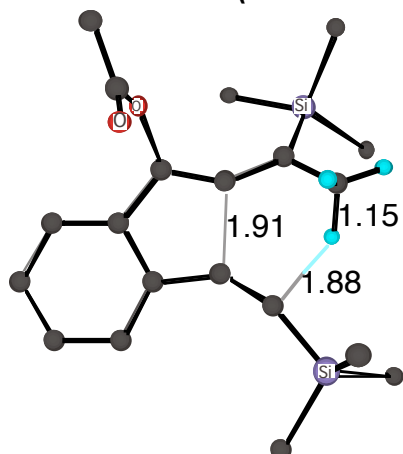

(most hydrogens removed for clarity)

E(RB+HF-LYP) = -1508.43292752

|                                              |                             |
|----------------------------------------------|-----------------------------|
| Zero-point correction=                       | 0.419670 (Hartree/Particle) |
| Thermal correction to Energy=                | 0.450177                    |
| Thermal correction to Enthalpy=              | 0.451121                    |
| Thermal correction to Gibbs Free Energy=     | 0.355928                    |
| Sum of electronic and zero-point Energies=   | -1508.013257                |
| Sum of electronic and thermal Energies=      | -1507.982751                |
| Sum of electronic and thermal Enthalpies=    | -1507.981806                |
| Sum of electronic and thermal Free Energies= | -1508.077000                |

|       | E (Thermal) | CV             | S              |
|-------|-------------|----------------|----------------|
|       | KCal/Mol    | Cal/Mol-Kelvin | Cal/Mol-Kelvin |
| Total | 282.490     | 110.692        | 200.351        |

```

C,0,-0.4751258211,-4.1084867277,-1.5235193383
C,0,0.9187294618,-4.1855869263,-1.4231797078
C,0,1.6551132187,-3.1158182929,-0.9124836929
C,0,0.9805251519,-1.9660585374,-0.498644357
C,0,-0.4247813102,-1.8858167413,-0.5932858489
C,0,-1.1519350879,-2.9562106857,-1.1168962606
C,0,1.527712036,-0.7368256148,0.0403223491
O,0,2.8766584599,-0.6493980482,0.3985117146
C,0,-0.9864523146,-0.6330650542,-0.0933518634
C,0,-2.0925998894,-0.0673611803,0.1636235584
Si,0,-3.8835582794,0.2026822773,0.4872777427
C,0,0.6638751773,0.2825803552,0.2015194641
C,0,0.5626384899,1.632058527,0.3545728016
C,0,-0.5263117772,2.1195014002,1.2098384812
Si,0,1.4646753171,2.8124490792,-0.8315566233
C,0,2.5345362297,3.9772891404,0.2127581174
C,0,0.1798444496,3.8292590357,-1.7837444937
C,0,2.5430606502,1.8469416202,-2.0408860044
C,0,-4.8661902846,-1.3267496338,-0.0475818938
C,0,-4.4811802077,1.6998235831,-0.5007955188
C,0,-4.1245001728,0.4954157477,2.3394570554
C,0,3.2552238,-1.1722074285,1.6160725108
H,0,-2.232846325,-2.8926434938,-1.1878843913
H,0,-1.0366227965,-4.9527614339,-1.9119264516
H,0,2.7377051312,-3.1658599453,-0.8523633937

```

H,0,1.4329425118,-5.0853596364,-1.7481071163  
 H,0,-0.6694265907,3.2023967277,1.2196950481  
 H,0,-1.4523294508,1.5981802585,0.7580197248  
 H,0,-0.5111228746,1.7292576604,2.2320876321  
 H,0,3.0415381738,4.7139000726,-0.4210296755  
 H,0,1.9321162001,4.526559756,0.9440528732  
 H,0,3.3027820047,3.4241695805,0.762833153  
 H,0,3.1043438677,2.5348298729,-2.6834531146  
 H,0,3.2616451518,1.2099524471,-1.517178841  
 H,0,1.9391742433,1.2034757892,-2.6886000204  
 H,0,0.6724580441,4.5364484007,-2.4609628517  
 H,0,-0.4636014135,3.1817156248,-2.3882844147  
 H,0,-0.4645609855,4.4100619283,-1.1156578602  
 H,0,-5.9372077096,-1.1836877519,0.1387405213  
 H,0,-4.7400565239,-1.5279929419,-1.1166158195  
 H,0,-4.5465668717,-2.2168553678,0.5038025409  
 H,0,-5.1860352273,0.6405995155,2.5700290041  
 H,0,-3.7686552804,-0.3589203758,2.923949731  
 H,0,-3.584177733,1.3836545297,2.6818287887  
 H,0,-5.5526159029,1.8669894571,-0.3417218985  
 H,0,-3.9525657899,2.6120645844,-0.2065270089  
 H,0,-4.323160513,1.554412807,-1.5745155261  
 O,0,2.4869864586,-1.6651434902,2.4002757354  
 C,0,4.7445509382,-1.0160648922,1.7974503848  
 H,0,5.0149594323,0.043405845,1.7655920757  
 H,0,5.0385445855,-1.4461155368,2.7540329541  
 H,0,5.2781480596,-1.513091224,0.982294606

**Structure 11 (ene transition structure), UBPW91/6-31G(d,p)**

E(UB-PW91) = -1508.27172091

|                                              |              |
|----------------------------------------------|--------------|
| Zero-point correction=                       | 0.409826     |
| (Hartree/Particle)                           |              |
| Thermal correction to Energy=                | 0.441225     |
| Thermal correction to Enthalpy=              | 0.442169     |
| Thermal correction to Gibbs Free Energy=     | 0.344612     |
| Sum of electronic and zero-point Energies=   | -1507.861895 |
| Sum of electronic and thermal Energies=      | -1507.830496 |
| Sum of electronic and thermal Enthalpies=    | -1507.829552 |
| Sum of electronic and thermal Free Energies= | -1507.927109 |

|         | E (Thermal) | CV             | S        |
|---------|-------------|----------------|----------|
| Kelvin  | KCal/Mol    | Cal/Mol-Kelvin | Cal/Mol- |
| Total   | 276.873     | 113.630        |          |
| 205.327 |             |                |          |

C,0,-0.3270068822,-4.1446238077,-1.6150997404  
 C,0,1.0733021562,-4.1789497529,-1.4939698758  
 C,0,1.7691378245,-3.0889753432,-0.952124938  
 C,0,1.051017852,-1.9606481228,-0.5272126267  
 C,0,-0.3644241887,-1.9241989748,-0.6397328276

C,0,-1.0493883791,-3.0171007394,-1.1960128902  
C,0,1.5702019537,-0.7270931979,0.0367735937  
O,0,2.9191603473,-0.6382088025,0.4311292479  
C,0,-0.9959336617,-0.7154803648,-0.1280468774  
C,0,-2.1131405809,-0.1724081854,0.1545837564  
Si,0,-3.8950813428,0.1397830898,0.5139869468  
C,0,0.7007594318,0.2969954974,0.1919833194  
C,0,0.5360380177,1.6387571904,0.3412538047  
C,0,-0.5622963707,2.0944152762,1.2214626282  
Si,0,1.3870098403,2.8524253144,-0.8628206703  
C,0,2.4490962102,4.040435023,0.1778205994  
C,0,0.0562248963,3.8482880696,-1.7889671093  
C,0,2.4690911026,1.9180139702,-2.1036786655  
C,0,-4.9197154507,-1.3465693279,-0.0868618612  
C,0,-4.4692445961,1.7007077548,-0.4023638979  
C,0,-4.1157728635,0.3525787509,2.3874866945  
C,0,3.2452257265,-1.0999537825,1.7047826452  
H,0,-2.1373205391,-2.9870831241,-1.2803337803  
H,0,-0.8595733356,-5.0041507853,-2.0288807986  
H,0,2.8582709757,-3.1041955715,-0.8750856545  
H,0,1.6254869698,-5.0610806606,-1.8274979249  
H,0,-0.7365118763,3.1791832576,1.2282745077  
H,0,-1.4813972147,1.5480635321,0.7981165909  
H,0,-0.4948425811,1.7141335388,2.252202603  
H,0,2.9307536369,4.7960657813,-0.4635252592  
H,0,1.8405584378,4.5729841436,0.9250591209  
H,0,3.2417381784,3.4976648099,0.7148915149  
H,0,3.0025984671,2.6277459914,-2.7560618413  
H,0,3.2178358055,1.2932840661,-1.5953899175  
H,0,1.8634750364,1.2602406856,-2.7452155762  
H,0,0.5248792228,4.5709362474,-2.476475443  
H,0,-0.587857945,3.1849818777,-2.3861693318  
H,0,-0.5892985005,4.4169359761,-1.1022353215  
H,0,-5.9909959322,-1.1846447961,0.1162392677  
H,0,-4.8035918626,-1.4992624137,-1.1707977154  
H,0,-4.6149558384,-2.2728651526,0.4231694424  
H,0,-5.1794760726,0.5028470417,2.6324943879  
H,0,-3.7648663735,-0.5370921948,2.9316957462  
H,0,-3.5570494553,1.2220041125,2.7649066701  
H,0,-5.5406683132,1.883895009,-0.2215755302  
H,0,-3.9135178335,2.5909543504,-0.0713282373  
H,0,-4.3246753465,1.5981154199,-1.4887774127  
O,0,2.4360569009,-1.5341927842,2.4968081528  
C,0,4.7351959076,-0.9489283036,1.9250519257  
H,0,5.0153396078,0.1141878082,1.8811437377  
H,0,5.0001669947,-1.3606998804,2.90495316  
H,0,5.2965501046,-1.4664238134,1.1336099746

**Structure 12 (diradical), UB3LYP/6-31G(d,p)**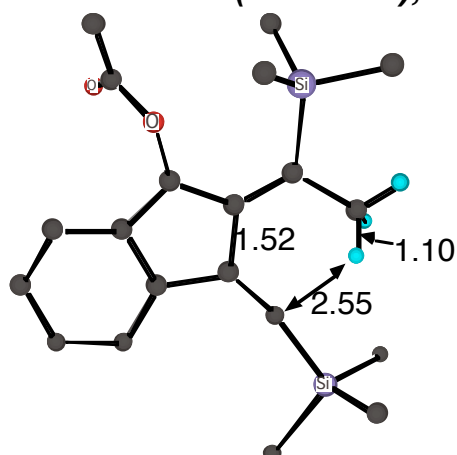

(most hydrogens removed for clarity)

E(UB+HF-LYP) = -1508.44810618

|                                              |                            |
|----------------------------------------------|----------------------------|
| Zero-point correction=                       | .422109 (Hartree/Particle) |
| Thermal correction to Energy=                | .452698                    |
| Thermal correction to Enthalpy=              | .453643                    |
| Thermal correction to Gibbs Free Energy=     | .359205                    |
| Sum of electronic and zero-point Energies=   | -1508.025997               |
| Sum of electronic and thermal Energies=      | -1507.995408               |
| Sum of electronic and thermal Enthalpies=    | -1507.994464               |
| Sum of electronic and thermal Free Energies= | -1508.088901               |

|       | E (Thermal) | CV             | S              |
|-------|-------------|----------------|----------------|
|       | KCAL/MOL    | CAL/MOL-KELVIN | CAL/MOL-KELVIN |
| TOTAL | 284.073     | 111.608        | 198.761        |

```

C,0,1.6539169668,4.0971440398,-0.2658661267
C,0,0.3005816138,4.4561239005,-0.3263347307
C,0,-0.700814282,3.4874748172,-0.2984413978
C,0,-0.3276582525,2.137984796,-0.2083248019
C,0,1.0406100451,1.7781471122,-0.1548378762
C,0,2.0300858947,2.7513682577,-0.1808783841
C,0,-1.0944348903,0.9250526066,-0.1838564258
O,0,-2.4626198098,0.8782265636,-0.3587485322
C,0,1.1446268754,0.2934528202,-0.0950522578
C,0,2.2826554862,-0.3803431275,-0.0048539529
Si,0,4.0239637534,-0.9398645995,0.1332153692
C,0,-0.2754454185,-0.2379714769,-0.1379875518
C,0,-0.6461627289,-1.5834926435,-0.1400312942
C,0,0.4555990361,-2.6216209569,-0.1368893005
Si,0,-2.4327964278,-2.2512972558,-0.109670261
C,0,-3.3417078912,-1.7240299676,1.4742084938
C,0,-2.3861469507,-4.1494199587,-0.0436878843
C,0,-3.392582544,-1.8330980914,-1.6923532202
C,0,5.2236578095,0.5280322355,0.1737132174
C,0,4.4287736759,-2.0241500606,-1.3636041505
C,0,4.2096944189,-1.9338185033,1.7322443374
C,0,-3.2939403044,1.5820793165,0.4906602449
O,0,-2.9132658541,2.1263296798,1.4947642936
C,0,-4.7063752377,1.5523289963,-0.0323422951
H,0,2.4171782207,4.8691506832,-0.2873075001

```

```

H,0,0.0270897799,5.5050843529,-0.3926046416
H,0,-1.7440700362,3.779210062,-0.3324369625
H,0,3.0782770004,2.473489747,-0.1420588332
H,0,0.0743619149,-3.6399023288,-0.2192088603
H,0,1.1579610077,-2.4596156962,-0.9647861138
H,0,1.0511760775,-2.5663334921,0.7852674222
H,0,-4.418741771,-1.9105231532,1.3866451576
H,0,-2.978284056,-2.3297126865,2.3120628469
H,0,-3.1968778932,-0.678601915,1.753097609
H,0,-3.4155621051,-4.5230965229,0.0139708353
H,0,-1.9321592955,-4.5944073878,-0.9354479584
H,0,-1.8542673391,-4.5319273836,0.8337836759
H,0,-4.4155424695,-2.2239950783,-1.630519031
H,0,-3.4409811467,-0.7614772116,-1.8902358603
H,0,-2.9138824707,-2.3127088381,-2.5536040109
H,0,6.2547632784,0.1677674097,0.2708746513
H,0,5.1653894972,1.1219915529,-0.7441604976
H,0,5.0224672289,1.1910672346,1.0212911033
H,0,5.4707007907,-2.3617654923,-1.3213464175
H,0,3.7905498586,-2.9126193635,-1.4001619439
H,0,4.2934459978,-1.4755098799,-2.3012591177
H,0,5.244384507,-2.273761817,1.8558958454
H,0,3.9489026127,-1.3308674344,2.6079337021
H,0,3.5645818978,-2.8181158947,1.7304218596
H,0,-4.7524170736,2.0455001385,-1.0080099582
H,0,-5.0374265317,0.5200797958,-0.1718618633
H,0,-5.359874662,2.0639519537,0.6730993973

```

**Structure 13 (ts from diradical to product), UB3LYP/6-31G(d,p)**

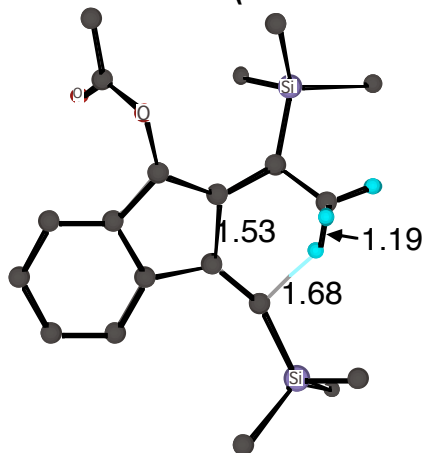

(most hydrogens removed for clarity)

E(UB+HF-LYP) = -1508.44206941

|                                              |                             |
|----------------------------------------------|-----------------------------|
| Zero-point correction=                       | 0.419118 (Hartree/Particle) |
| Thermal correction to Energy=                | 0.448695                    |
| Thermal correction to Enthalpy=              | 0.449640                    |
| Thermal correction to Gibbs Free Energy=     | 0.359101                    |
| Sum of electronic and zero-point Energies=   | -1508.022952                |
| Sum of electronic and thermal Energies=      | -1507.993374                |
| Sum of electronic and thermal Enthalpies=    | -1507.992430                |
| Sum of electronic and thermal Free Energies= | -1508.082968                |

E (Thermal)

CV

S

| TOTAL                                         | KCAL/MOL<br>281.561 | CAL/MOL-KELVIN<br>109.541 | CAL/MOL-KELVIN<br>190.554 |
|-----------------------------------------------|---------------------|---------------------------|---------------------------|
| C,0,-0.3603628844,-0.1757387289,-0.3808474133 |                     |                           |                           |
| C,0,-1.0924849276,1.0051729517,-0.3544794447  |                     |                           |                           |
| C,0,-0.258193296,2.1588671423,-0.0955360613   |                     |                           |                           |
| C,0,1.0765534863,1.6977957342,0.0380192017    |                     |                           |                           |
| C,0,1.1023403682,0.2253274449,-0.1429044376   |                     |                           |                           |
| C,0,2.1112621468,2.5936936283,0.2804608763    |                     |                           |                           |
| C,0,1.8211285416,3.9587836298,0.3694260491    |                     |                           |                           |
| C,0,0.5049313664,4.4154721985,0.232919485     |                     |                           |                           |
| C,0,-0.5445177142,3.5258046211,0.0031760183   |                     |                           |                           |
| O,0,-2.407668887,1.0623279916,-0.7917758086   |                     |                           |                           |
| C,0,-3.3541591698,1.7465212113,-0.0690768403  |                     |                           |                           |
| C,0,-4.6562565448,1.7867220017,-0.8274091608  |                     |                           |                           |
| C,0,2.1222118506,-0.6159440102,-0.0437987884  |                     |                           |                           |
| Si,0,3.905754453,-1.0751828527,0.0845564319   |                     |                           |                           |
| C,0,4.1686485624,-1.9379850067,1.7471813237   |                     |                           |                           |
| C,0,-0.7456990384,-1.5278776081,-0.4831952089 |                     |                           |                           |
| Si,0,-2.3819299574,-2.2446162639,0.159277691  |                     |                           |                           |
| C,0,-3.7091151965,-2.1345472333,-1.1921633469 |                     |                           |                           |
| C,0,5.1010821799,0.3928423766,-0.046447881    |                     |                           |                           |
| C,0,4.2787113316,-2.270614033,-1.3357622663   |                     |                           |                           |
| C,0,0.3243052018,-2.4297659491,-0.9134561725  |                     |                           |                           |
| C,0,-2.9370562707,-1.3919387362,1.7549600208  |                     |                           |                           |
| C,0,-2.1242325782,-4.0805088551,0.5604133412  |                     |                           |                           |
| O,0,-3.153317787,2.2220100946,1.0213884916    |                     |                           |                           |
| H,0,2.6243214969,4.6695661288,0.5390532308    |                     |                           |                           |
| H,0,0.2946427608,5.4780184363,0.3128804029    |                     |                           |                           |
| H,0,-1.562342767,3.8893242249,-0.0637565764   |                     |                           |                           |
| H,0,3.1311655461,2.2415677277,0.3810555282    |                     |                           |                           |
| H,0,0.1518146355,-3.4950241026,-0.7544809883  |                     |                           |                           |
| H,0,0.6893150365,-2.256141302,-1.9321839964   |                     |                           |                           |
| H,0,1.273718043,-2.0441943389,-0.3055357493   |                     |                           |                           |
| H,0,-3.9312068494,-1.747440661,2.050158514    |                     |                           |                           |
| H,0,-2.2461611725,-1.6436197446,2.5673247582  |                     |                           |                           |
| H,0,-2.9744373069,-0.3018508934,1.6921842809  |                     |                           |                           |
| H,0,-3.0459295014,-4.4930875741,0.9867533544  |                     |                           |                           |
| H,0,-1.881474273,-4.6761209059,-0.3255992173  |                     |                           |                           |
| H,0,-1.328213697,-4.2321270098,1.2972739421   |                     |                           |                           |
| H,0,-4.6825590638,-2.4691471788,-0.8147128003 |                     |                           |                           |
| H,0,-3.8143210534,-1.1143549841,-1.5695458487 |                     |                           |                           |
| H,0,-3.4453486763,-2.7738138857,-2.0416980821 |                     |                           |                           |
| H,0,6.1328054422,0.0243640478,-0.0979555882   |                     |                           |                           |
| H,0,4.9173772826,0.9895267596,-0.9455654722   |                     |                           |                           |
| H,0,5.033759884,1.0553872653,0.8224250411     |                     |                           |                           |
| H,0,5.3212105443,-2.605594621,-1.2901245537   |                     |                           |                           |
| H,0,3.6404040941,-3.1588495225,-1.2935979444  |                     |                           |                           |
| H,0,4.1255252669,-1.7932249463,-2.3092037726  |                     |                           |                           |
| H,0,5.2112084067,-2.2590564999,1.8530119115   |                     |                           |                           |
| H,0,3.9388917657,-1.2693319844,2.5830990997   |                     |                           |                           |
| H,0,3.5329710425,-2.823718636,1.8436669056    |                     |                           |                           |
| H,0,-4.4951463778,2.1419457395,-1.8483785116  |                     |                           |                           |
| H,0,-5.0775418113,0.7788694994,-0.8926036699  |                     |                           |                           |
| H,0,-5.3546827338,2.4381152274,-0.3033991467  |                     |                           |                           |

**Structure 14 (ts for reversed diradical formation), UB3LYP/6-31G(d,p)**

4threversedTSBetter

E(UB+HF-LYP) = -1508.41856655

|                                              |                             |
|----------------------------------------------|-----------------------------|
| Zero-point correction=                       | 0.419274 (Hartree/Particle) |
| Thermal correction to Energy=                | 0.450519                    |
| Thermal correction to Enthalpy=              | 0.451463                    |
| Thermal correction to Gibbs Free Energy=     | 0.355038                    |
| Sum of electronic and zero-point Energies=   | -1507.999293                |
| Sum of electronic and thermal Energies=      | -1507.968047                |
| Sum of electronic and thermal Enthalpies=    | -1507.967103                |
| Sum of electronic and thermal Free Energies= | -1508.063529                |

|       | E (Thermal) | CV             | S              |
|-------|-------------|----------------|----------------|
|       | KCal/Mol    | Cal/Mol-Kelvin | Cal/Mol-Kelvin |
| Total | 282.705     | 111.880        | 202.945        |

C,0,0.1178667812,2.3322152879,-0.1129367517  
 C,0,-0.3393228295,3.6034127871,-0.4606013578  
 C,0,0.5750327146,4.6569735784,-0.544855309  
 C,0,1.9305960623,4.4451371565,-0.270583048  
 C,0,2.3937740782,3.1766634968,0.0858416157  
 C,0,1.4816764709,2.1241392313,0.1587865683  
 C,0,1.7140023493,0.7330606142,0.491608408  
 O,0,3.0200641035,0.3171327101,0.7768255638  
 C,0,3.6984612613,-0.4597513159,-0.1238902457  
 O,0,3.2437448117,-0.8420483464,-1.1742310924  
 C,0,-0.7069191323,1.1291945894,0.0347757616  
 C,0,-1.9490674263,0.8598143405,0.0126514836  
 Si,0,-3.7094018767,0.3537598776,0.1265953975  
 C,0,-3.9739460209,-0.6976104503,1.6784723972  
 C,0,0.6628457239,-0.10517181,0.506946866  
 C,0,0.5208084427,-1.4399360721,0.8326402953  
 C,0,0.7187278506,-1.83852592,2.2784093263  
 Si,0,0.0957699326,-2.7522494976,-0.470109453  
 C,0,1.544686673,-3.9730565939,-0.5465505436  
 C,0,-0.1450350535,-1.9439575152,-2.1548173509  
 C,0,-1.4584330733,-3.7044269096,0.0635272434  
 C,0,-4.1915440721,-0.6060469971,-1.4287737662  
 C,0,-4.7670237493,1.9186462865,0.2575770255  
 C,0,5.0759485314,-0.7718376205,0.4070043184  
 H,0,-1.3923645173,3.7598211814,-0.6714501879  
 H,0,0.2293596957,5.6463334993,-0.8291061607  
 H,0,3.4422046271,3.0080838621,0.309685235  
 H,0,2.6292931893,5.2741583507,-0.3353145033  
 H,0,1.1069238347,-2.8593927583,2.3705863982  
 H,0,1.3989075057,-1.1551874353,2.796823683  
 H,0,-0.2378730834,-1.8187405353,2.8238242097  
 H,0,-1.6572042162,-4.5298409926,-0.6298380336  
 H,0,-1.3404462842,-4.1370272142,1.0631335642  
 H,0,-2.3469832997,-3.0657132606,0.0791606821  
 H,0,-0.3379790357,-2.6984457709,-2.9257051975  
 H,0,-0.9796785129,-1.2368825595,-2.1543615101  
 H,0,0.7595592369,-1.3946737689,-2.4331340212  
 H,0,1.3228659079,-4.7819198991,-1.2524441302  
 H,0,2.4502373228,-3.4635249971,-0.8888223101  
 H,0,1.7537029986,-4.4334496004,0.4251696108  
 H,0,-5.8273573941,1.6573253284,0.3540541255



H,0,-4.4883312276,2.5149548465,1.1321976731  
H,0,-4.656811364,2.5505525715,-0.6294137938  
H,0,-5.2500819205,-0.887593785,-1.3914258413  
H,0,-4.0386002471,0.0001504097,-2.3274042536  
H,0,-3.6047233013,-1.5227705864,-1.5411948136  
H,0,-5.025174409,-0.9958693505,1.7660796788  
H,0,-3.3678925907,-1.6083268722,1.6635521436  
H,0,-3.7101596065,-0.1347830174,2.5797849308  
H,0,4.9921197317,-1.3638004536,1.3234124358  
H,0,5.6346868463,-1.3300562207,-0.3431187472  
H,0,5.6033625151,0.1511818143,0.6623125205

**Restricted Analog of Structure 14 (ts for reversed diradical formation),  
RB3LYP/6-31G(d,p)**

E(RB+HF-LYP) = -1508.41271658

|                                              |                             |
|----------------------------------------------|-----------------------------|
| Zero-point correction=                       | 0.420091 (Hartree/Particle) |
| Thermal correction to Energy=                | 0.450884                    |
| Thermal correction to Enthalpy=              | 0.451828                    |
| Thermal correction to Gibbs Free Energy=     | 0.357271                    |
| Sum of electronic and zero-point Energies=   | -1507.992626                |
| Sum of electronic and thermal Energies=      | -1507.961833                |
| Sum of electronic and thermal Enthalpies=    | -1507.960889                |
| Sum of electronic and thermal Free Energies= | -1508.055445                |

|       | E (Thermal) | CV             | S              |
|-------|-------------|----------------|----------------|
|       | KCal/Mol    | Cal/Mol-Kelvin | Cal/Mol-Kelvin |
| Total | 282.934     | 111.360        | 199.011        |

C,0,0.1457756672,2.1531623571,-0.3157120388  
C,0,0.9108768316,3.3191999283,-0.2824299722  
C,0,0.2686744519,4.5561989452,-0.3643054285  
C,0,-1.1247500913,4.6349528551,-0.5104295125  
C,0,-1.897369687,3.4783157207,-0.5607579212  
C,0,-1.2554296258,2.2367505358,-0.4652568639  
C,0,-1.8066824825,0.9160365398,-0.4762425268  
O,0,-3.1828915284,0.7598397028,-0.3537178356  
C,0,-3.7293536601,0.1528679319,0.7550274128  
O,0,-3.0870724746,-0.2775767936,1.6780904865  
C,0,0.6331783966,0.7646216339,-0.205454659  
C,0,1.8123158156,0.2820440218,-0.1034961844  
Si,0,3.6097498271,0.0210237725,0.1205823577  
C,0,4.3615570971,-0.596297966,-1.5040791223  
C,0,-0.9007758679,-0.1180766513,-0.4741280165  
C,0,-1.065258479,-1.4493706232,-0.71856038  
C,0,-2.0415502439,-1.8801377331,-1.7950491354  
Si,0,-0.1642806891,-2.823857594,0.2355141534  
C,0,-1.3360163721,-4.3115681076,0.3346383046  
C,0,0.2438898303,-2.2616805848,1.9873421322  
C,0,1.3676185785,-3.3305775852,-0.7606741918  
C,0,3.9307141224,-1.2245077706,1.5089023972  
C,0,4.4657912687,1.6522345668,0.586002008  
C,0,-5.2307367068,0.1108679177,0.6161115796  
H,0,1.9867377375,3.2593717855,-0.1602383972  
H,0,0.8540363292,5.4685012699,-0.2979164058  
H,0,-2.9729710578,3.5269228752,-0.6963460578  
H,0,-1.6033222844,5.6071553158,-0.5834747299

```

H,0,-2.8518660115,-2.4884381107,-1.370972276
H,0,-2.4859277913,-1.0292023319,-2.3166590396
H,0,-1.5483488571,-2.5177790405,-2.542456759
H,0,1.9936576208,-4.0309809914,-0.1965523577
H,0,1.0731537482,-3.8230189436,-1.6938079242
H,0,1.976078662,-2.4598567816,-1.0169659446
H,0,0.6582460393,-3.0841153197,2.5816003466
H,0,0.9638744554,-1.4401233418,1.9881693714
H,0,-0.6655423651,-1.904216956,2.481617718
H,0,-0.8534320948,-5.1290799643,0.882693246
H,0,-2.2586633016,-4.0598735757,0.8683425797
H,0,-1.6089063106,-4.6961039794,-0.6534478632
H,0,5.536480375,1.4857050446,0.7569343694
H,0,4.3700566578,2.3973225646,-0.2107499902
H,0,4.0430489963,2.079444565,1.5010264722
H,0,5.0099805061,-1.3419238928,1.6606244722
H,0,3.4968771068,-0.8884111555,2.4560424674
H,0,3.5134637108,-2.2086584398,1.27883493
H,0,5.452667712,-0.6575671883,-1.4174605519
H,0,3.9925510236,-1.589685061,-1.7764341448
H,0,4.1319617584,0.0838845714,-2.330820984
H,0,-5.507511601,-0.4536813128,-0.2790586418
H,0,-5.6613834129,-0.3577511588,1.5000693243
H,0,-5.6266663204,1.1235141869,0.4983871211

```

### **Structure 15 (reversed diradical), UB3LYP/6-31G(d,p)**

E(UB+HF-LYP) = -1508.44236212

```

Zero-point correction=          0.421634 (Hartree/Particle)
Thermal correction to Energy=    0.452512
Thermal correction to Enthalpy=  0.453456
Thermal correction to Gibbs Free Energy= 0.358080
Sum of electronic and zero-point Energies= -1508.020728
Sum of electronic and thermal Energies= -1507.989850
Sum of electronic and thermal Enthalpies= -1507.988906
Sum of electronic and thermal Free Energies= -1508.084282

```

|       | E (Thermal) | CV             | S              |
|-------|-------------|----------------|----------------|
|       | KCal/Mol    | Cal/Mol-Kelvin | Cal/Mol-Kelvin |
| Total | 283.955     | 111.902        | 200.736        |

```

C,0,0.6706497456,0.5617933614,-0.0508663259
C,0,1.9803394816,0.0265118707,-0.1113639943
C,0,1.9850392522,-1.3911207182,-0.3457983778
C,0,0.6375954811,-1.8206566576,-0.402507794
C,0,-0.2440014597,-0.6423948226,-0.1527132665
C,0,0.3353221416,-3.1507743865,-0.6604026012
C,0,1.3839490877,-4.0579736271,-0.8596794949
C,0,2.7172510929,-3.6334207208,-0.800160533
C,0,3.0323885715,-2.2992351416,-0.5450273149
O,0,3.1211772299,0.8044525861,-0.1956163543
C,0,4.1177469375,0.6495545411,0.7407613312
C,0,5.2799258674,1.5467682833,0.3990673875
C,0,-1.5453879788,-0.7072107313,0.0957379306
Si,0,-3.2006760092,-1.4151101304,0.5019882209
C,0,-3.489591505,-1.1876506869,2.3577929036
C,0,0.3045953212,1.908367418,0.0796644973

```

```

Si,0,-1.347875112,2.679703107,-0.4518459864
C,0,-2.6091258022,2.6959027414,0.9655396672
C,0,-3.3002368474,-3.2658784408,0.0966756116
C,0,-4.5387334731,-0.523733898,-0.4924388157
C,0,1.3436317421,2.9057452153,0.5675490151
C,0,-2.0431046654,1.8960656344,-2.0300726846
C,0,-1.0142158735,4.4978027702,-0.8986657513
O,0,4.0373896851,-0.0905759007,1.6874928045
H,0,1.1596077103,-5.0999296867,-1.0672224704
H,0,3.5163783949,-4.3521977677,-0.9559379219
H,0,4.0667055807,-1.9774606162,-0.4937111955
H,0,-0.6945190032,-3.4829574467,-0.7231028292
H,0,0.8684420833,3.8001756595,0.9796718371
H,0,1.9739561347,2.4809794809,1.3536842587
H,0,2.008737457,3.2451651743,-0.2380463079
H,0,-2.9969177255,2.3676823587,-2.2942448412
H,0,-1.351400968,2.066311951,-2.862679449
H,0,-2.2075348853,0.8209087717,-1.9476635503
H,0,-1.9213191725,4.9309539729,-1.336244688
H,0,-0.7466572528,5.1134237061,-0.0342342966
H,0,-0.214965458,4.5979884088,-1.6408872546
H,0,-3.5436136602,3.1737588252,0.6486112791
H,0,-2.8437971133,1.6908534271,1.3227003028
H,0,-2.2191241508,3.2665553287,1.8157153801
H,0,-4.3037199126,-3.6367700794,0.3380145686
H,0,-3.1240482786,-3.4613348244,-0.9660412297
H,0,-2.5818279498,-3.8521045614,0.6776119128
H,0,-5.522636589,-0.9402171255,-0.2475884216
H,0,-4.5641984964,0.5478143777,-0.2763626886
H,0,-4.3855676423,-0.6450062619,-1.5695667252
H,0,-4.4573122824,-1.6143101303,2.6460495669
H,0,-2.7133901552,-1.6929800562,2.9412698068
H,0,-3.4906754305,-0.1326040532,2.6470999739
H,0,5.6358061295,1.3361851442,-0.6132486579
H,0,4.959459984,2.5927275158,0.420593062
H,0,6.081090325,1.3903013253,1.1202093536

```

### Structure 16, model starting material, RB3LYP/6-311+G(d,p)

E(RB+HF-LYP) = -348.944978128

```

Zero-point correction=          0.155074 (Hartree/Particle)
Thermal correction to Energy=    0.166020
Thermal correction to Enthalpy=  0.166964
Thermal correction to Gibbs Free Energy= 0.116662
Sum of electronic and zero-point Energies= -348.789904
Sum of electronic and thermal Energies= -348.778958
Sum of electronic and thermal Enthalpies= -348.778014
Sum of electronic and thermal Free Energies= -348.828316

```

|       | E (Thermal) | CV             | S              |
|-------|-------------|----------------|----------------|
|       | KCal/Mol    | Cal/Mol-Kelvin | Cal/Mol-Kelvin |
| Total | 104.179     | 36.973         | 105.870        |

```

C,0,0.9724769804,1.8574408216,0.0663047322
C,0,1.4606692184,0.7621228502,-0.0885879885
C,0,2.1126855815,-0.4781806113,-0.280576767
C,0,1.5634721155,-1.7121920012,-0.2180233862

```

C,0,0.1840595985,-2.1052134827,0.0530230912  
 C,0,-0.8624881572,-1.3419548866,0.2941332517  
 C,0,-1.9429571181,-0.6551548821,0.5327783133  
 C,0,-2.8992987335,-0.1451831571,-0.5185665695  
 C,0,0.353376512,3.1585512663,0.2685836196  
 H,0,0.0072098918,-3.1803928289,0.0523935508  
 H,0,2.2367453353,-2.5455545474,-0.393487815  
 H,0,3.1755473921,-0.4184126759,-0.5007938623  
 H,0,-2.1762570835,-0.4061133255,1.5684727758  
 H,0,-3.9110231609,-0.5216409748,-0.335290812  
 H,0,-2.590462605,-0.4524985236,-1.5183364814  
 H,0,-2.9505157027,0.9484704127,-0.4948336243  
 H,0,1.003614609,3.8199232239,0.8493034772  
 H,0,0.1487161783,3.6514338557,-0.6872673429  
 H,0,-0.5955508391,3.0633698807,0.8054303528

### Structure 17 (model ene transition structure), RB3LYP/6-311+G(d,p)

E(RB+HF-LYP) = -348.891441144

|                                              |                             |
|----------------------------------------------|-----------------------------|
| Zero-point correction=                       | 0.152374 (Hartree/Particle) |
| Thermal correction to Energy=                | 0.161449                    |
| Thermal correction to Enthalpy=              | 0.162393                    |
| Thermal correction to Gibbs Free Energy=     | 0.118572                    |
| Sum of electronic and zero-point Energies=   | -348.739067                 |
| Sum of electronic and thermal Energies=      | -348.729992                 |
| Sum of electronic and thermal Enthalpies=    | -348.729048                 |
| Sum of electronic and thermal Free Energies= | -348.772870                 |

|       | E (Thermal) | CV             | S              |
|-------|-------------|----------------|----------------|
|       | KCal/Mol    | Cal/Mol-Kelvin | Cal/Mol-Kelvin |
| Total | 101.311     | 33.963         | 92.230         |

C,0,0.4688658684,1.4746868646,-0.0637473392  
 C,0,-0.467956475,0.6315875453,-0.0707044631  
 C,0,-1.8913641618,0.4424797564,-0.1836971402  
 C,0,-2.321076316,-0.8383257827,-0.0910151472  
 C,0,-1.2528221603,-1.7913689582,0.1109636974  
 C,0,-0.0151445756,-1.2811476261,-0.0139111032  
 C,0,1.2974210572,-1.5031152374,-0.2610784314  
 C,0,2.3061524307,-0.6147618687,0.2873755993  
 C,0,1.0073360946,2.8230537545,0.1566638756  
 H,0,-1.4340744336,-2.8069119179,0.4439383532  
 H,0,-3.3641196875,-1.125989407,-0.1232518994  
 H,0,-2.537194559,1.2962030258,-0.3468443676  
 H,0,1.5533111138,-2.1107697129,-1.1282227243  
 H,0,3.3131736806,-0.7628075343,-0.1008677456  
 H,0,2.3140499267,-0.5363835203,1.3761034023  
 H,0,1.8867572824,0.4370272401,-0.028939308  
 H,0,1.6879977599,3.125605357,-0.6451500869  
 H,0,0.2102394873,3.5726521234,0.2388730498  
 H,0,1.581388856,2.8528436595,1.0892640385

### Structure 17 (model ene transition structure), MP2/6-31G(d,p)

MP2=-347.6769264

|                        |                             |
|------------------------|-----------------------------|
| Zero-point correction= | 0.157005 (Hartree/Particle) |
|------------------------|-----------------------------|

|                                              |             |
|----------------------------------------------|-------------|
| Thermal correction to Energy=                | 0.165993    |
| Thermal correction to Enthalpy=              | 0.166937    |
| Thermal correction to Gibbs Free Energy=     | 0.123490    |
| Sum of electronic and zero-point Energies=   | -347.519921 |
| Sum of electronic and thermal Energies=      | -347.510933 |
| Sum of electronic and thermal Enthalpies=    | -347.509989 |
| Sum of electronic and thermal Free Energies= | -347.553436 |

|       | E (Thermal)<br>KCal/Mol | CV<br>Cal/Mol-Kelvin | S<br>Cal/Mol-Kelvin |
|-------|-------------------------|----------------------|---------------------|
| Total | 104.162                 | 33.750               | 91.442              |

C,0,0.4452266038,1.492822413,-0.0331550038  
 C,0,-0.4980964457,0.6495573843,-0.1174956174  
 C,0,-1.9166999752,0.4239621192,-0.1968212378  
 C,0,-2.3247168808,-0.8643232423,-0.069804672  
 C,0,-1.244213877,-1.8097807352,0.1327651722  
 C,0,-0.0072759242,-1.3147136489,-0.041356437  
 C,0,1.3153845687,-1.484043001,-0.2972890983  
 C,0,2.2653995115,-0.5712831194,0.3167849944  
 C,0,1.0784823471,2.8067523645,0.160768171  
 H,0,-1.4153149886,-2.8168727477,0.4918824238  
 H,0,-3.3646161327,-1.1608614367,-0.0671329129  
 H,0,-2.587503112,1.2586271377,-0.3526833221  
 H,0,1.5931481895,-1.96734208,-1.2312528028  
 H,0,3.290870494,-0.6758882698,-0.0275887337  
 H,0,2.2177211319,-0.5349330809,1.4034923695  
 H,0,1.8361328361,0.4647772167,0.0086767549  
 H,0,1.7564535247,3.0427530254,-0.6600803332  
 H,0,0.3281644728,3.5971394434,0.2269398934  
 H,0,1.6640040151,2.8188975867,1.0813690352

### Structure 18 (model ene product), RB3LYP/6-311+G(d,p)

E(RB+HF-LYP) = -349.005755530

|                                              |                             |
|----------------------------------------------|-----------------------------|
| Zero-point correction=                       | 0.158554 (Hartree/Particle) |
| Thermal correction to Energy=                | 0.167380                    |
| Thermal correction to Enthalpy=              | 0.168325                    |
| Thermal correction to Gibbs Free Energy=     | 0.125036                    |
| Sum of electronic and zero-point Energies=   | -348.847202                 |
| Sum of electronic and thermal Energies=      | -348.838375                 |
| Sum of electronic and thermal Enthalpies=    | -348.837431                 |
| Sum of electronic and thermal Free Energies= | -348.880719                 |

|       | E (Thermal)<br>KCal/Mol | CV<br>Cal/Mol-Kelvin | S<br>Cal/Mol-Kelvin |
|-------|-------------------------|----------------------|---------------------|
| Total | 105.033                 | 33.306               | 91.108              |

C,0,0.2713555833,-0.9489497727,-0.1109982059  
 C,0,-0.3503880678,0.3958836069,0.0436828193  
 C,0,-1.7807334168,0.159374758,0.282181425  
 C,0,-2.0051490812,-1.177053217,0.2172019431  
 C,0,-0.7441915116,-1.8605960054,-0.0356295849  
 C,0,0.2505303631,1.5865197035,-0.1550396142  
 C,0,1.6740118868,-1.2990149634,-0.2749663492  
 C,0,2.7581063691,-0.6052639999,0.1027670419  
 C,0,-0.3855123669,2.9349498494,-0.0547552162

H,0,-0.6288518549,-2.9336379147,-0.1200942938  
H,0,-2.9622464453,-1.669659075,0.3252666778  
H,0,-2.5243634795,0.9283808474,0.4280364547  
H,0,1.8375683291,-2.2751095688,-0.7288657412  
H,0,3.7521833493,-0.9999319749,-0.0709928075  
H,0,2.6973199501,0.3433088583,0.6215102636  
H,0,1.2986206173,1.5854844746,-0.4387660876  
H,0,0.1595344217,3.5580976492,0.6635827155  
H,0,-0.3276738026,3.4552571584,-1.0180047786  
H,0,-1.4302696329,2.8927097895,0.2516620435

### **Structure 19 (model diradical), UB3LYP/6-311+G(d,p)**

E(UB+HF-LYP) = -348.924583642

|                                              |                             |
|----------------------------------------------|-----------------------------|
| Zero-point correction=                       | 0.154228 (Hartree/Particle) |
| Thermal correction to Energy=                | 0.164021                    |
| Thermal correction to Enthalpy=              | 0.164965                    |
| Thermal correction to Gibbs Free Energy=     | 0.119146                    |
| Sum of electronic and zero-point Energies=   | -348.770356                 |
| Sum of electronic and thermal Energies=      | -348.760563                 |
| Sum of electronic and thermal Enthalpies=    | -348.759619                 |
| Sum of electronic and thermal Free Energies= | -348.805438                 |

|       | E (Thermal) | CV             | S              |
|-------|-------------|----------------|----------------|
|       | KCal/Mol    | Cal/Mol-Kelvin | Cal/Mol-Kelvin |
| Total | 102.924     | 35.239         | 96.435         |

C,0,-0.9838679972,0.1864479313,0.0124939581  
C,0,0.407279859,-0.3844918799,-0.0069972368  
C,0,0.2389537152,-1.8446462135,-0.0241728365  
C,0,-1.1134969256,-2.1345334527,-0.0060651637  
C,0,-1.8661762607,-0.9452615285,0.0255167039  
C,0,1.562332488,0.2696810493,-0.020892774  
C,0,-1.3692057196,1.494634753,0.0005660547  
C,0,-0.4771313606,2.6927074949,-0.0159814009  
C,0,3.0028264131,0.0041995194,0.0219593358  
H,0,-2.9450864244,-0.8773344481,0.0526431211  
H,0,-1.5328538669,-3.1324877564,-0.0111392828  
H,0,1.052222116,-2.5549755112,-0.0519946768  
H,0,-2.4401484462,1.6856165357,0.0110280935  
H,0,-0.9084446675,3.4946900783,-0.6231700283  
H,0,0.5163312806,2.4508166334,-0.40319193  
H,0,-0.3385091745,3.1007527773,0.9947061167  
H,0,3.4629570605,0.473234033,0.8990262324  
H,0,3.2120405561,-1.0751317183,0.0756453898  
H,0,3.5124062968,0.4023933364,-0.8621128791

### **Restricted Analog of Structure 19 (model diradical), B3LYP/6-311+G(d,p)**

E(RB+HF-LYP) = -348.918046261

|                                          |                             |
|------------------------------------------|-----------------------------|
| Zero-point correction=                   | 0.155646 (Hartree/Particle) |
| Thermal correction to Energy=            | 0.164725                    |
| Thermal correction to Enthalpy=          | 0.165669                    |
| Thermal correction to Gibbs Free Energy= | 0.122037                    |

Sum of electronic and zero-point Energies= -348.762400  
 Sum of electronic and thermal Energies= -348.753322  
 Sum of electronic and thermal Enthalpies= -348.752377  
 Sum of electronic and thermal Free Energies= -348.796009

|       | E (Thermal)<br>KCal/Mol | CV<br>Cal/Mol-Kelvin | S<br>Cal/Mol-Kelvin |
|-------|-------------------------|----------------------|---------------------|
| Total | 103.366                 | 34.040               | 91.830              |

C,0,0.9544309432,0.2356059514,0.0593483964  
 C,0,-0.5367003219,0.1132960834,0.0108856165  
 C,0,-1.0204979315,1.436819015,0.0234421576  
 C,0,0.0681036866,2.3556733321,0.0723508476  
 C,0,1.2464378881,1.6502173622,0.1332850827  
 C,0,-1.2687679495,-1.0147070325,-0.3458603572  
 C,0,1.8894252018,-0.7441905741,-0.0099999221  
 C,0,1.6234369716,-2.2054298462,-0.050993459  
 C,0,-2.7022666526,-1.0846276221,0.0225550029  
 H,0,2.2385924209,2.0656583373,0.2510567941  
 H,0,-0.0286276639,3.4330294264,0.0868432952  
 H,0,-2.0593357602,1.716699715,-0.083183002  
 H,0,2.9291025657,-0.4244493305,-0.0661548644  
 H,0,2.3911303007,-2.7342721076,-0.6221864578  
 H,0,0.6180028274,-2.3865109306,-0.458560644  
 H,0,1.6296833368,-2.6243494802,0.9634617597  
 H,0,-2.7720120071,-1.8663105114,0.7946156041  
 H,0,-3.1577230435,-0.1742245154,0.4503465695  
 H,0,-3.3104239915,-1.4612106192,-0.806319247

### **Structure 20 (model ts from diradical to product), UB3LYP/6-311+G(d,p)**

E(UB+HF-LYP) = -348.915179034

Zero-point correction= 0.151613 (Hartree/Particle)  
 Thermal correction to Energy= 0.160009  
 Thermal correction to Enthalpy= 0.160953  
 Thermal correction to Gibbs Free Energy= 0.118876  
 Sum of electronic and zero-point Energies= -348.763566  
 Sum of electronic and thermal Energies= -348.755170  
 Sum of electronic and thermal Enthalpies= -348.754226  
 Sum of electronic and thermal Free Energies= -348.796303

|       | E (Thermal)<br>KCal/Mol | CV<br>Cal/Mol-Kelvin | S<br>Cal/Mol-Kelvin |
|-------|-------------------------|----------------------|---------------------|
| Total | 100.407                 | 32.649               | 88.560              |

C,0,-1.1348927375,-1.7913598576,-0.1784865552  
 C,0,0.0636097596,-1.0452668253,-0.2031591674  
 C,0,-0.3188713427,0.3891250253,0.0403865999  
 C,0,-1.7550469327,0.3910142037,0.1803503704  
 C,0,-2.2131063211,-0.9182549178,0.0713738713  
 C,0,1.3813535114,-1.4373233191,-0.2911917644  
 C,0,2.4218779268,-0.4374327492,-0.4553424893  
 C,0,0.5606936156,1.348153433,0.3983719213  
 C,0,0.3712195966,2.8138586902,0.4358556783  
 H,0,-1.2156014893,-2.8510705337,-0.3794977116  
 H,0,-3.2487638937,-1.2221972197,0.1516818975

H,0,-2.3511184433,1.2548498236,0.4379336471  
 H,0,1.6427920638,-2.4720042277,-0.082635587  
 H,0,3.4263530511,-0.7593750121,-0.1790859228  
 H,0,1.9978119586,0.4897157776,0.2006012588  
 H,0,2.4364810852,0.0445421059,-1.4360923621  
 H,0,0.6655185094,3.2282686334,1.4055322498  
 H,0,1.0383360841,3.2765654677,-0.3031141552  
 H,0,-0.6528313811,3.135623086,0.1957258961

**Restricted Analog of Structure 20 (model ts from diradical to product),  
 B3LYP/6-311+G(d,p)**

E(RB+HF-LYP) = -348.914503722

|                                              |                             |
|----------------------------------------------|-----------------------------|
| Zero-point correction=                       | 0.153204 (Hartree/Particle) |
| Thermal correction to Energy=                | 0.161316                    |
| Thermal correction to Enthalpy=              | 0.162260                    |
| Thermal correction to Gibbs Free Energy=     | 0.120767                    |
| Sum of electronic and zero-point Energies=   | -348.761300                 |
| Sum of electronic and thermal Energies=      | -348.753188                 |
| Sum of electronic and thermal Enthalpies=    | -348.752244                 |
| Sum of electronic and thermal Free Energies= | -348.793737                 |

|       | E (Thermal)<br>KCal/Mol | CV<br>Cal/Mol-Kelvin | S<br>Cal/Mol-Kelvin |
|-------|-------------------------|----------------------|---------------------|
| Total | 101.227                 | 31.833               | 87.330              |

C,0,-1.1380842213,-1.7784866941,-0.1905742946  
 C,0,0.0680961632,-1.0372684624,-0.2102275845  
 C,0,-0.3050418237,0.3992047482,0.0404868786  
 C,0,-1.7263759363,0.4071798405,0.1865881847  
 C,0,-2.2011967589,-0.9067265079,0.0714193864  
 C,0,1.3759563193,-1.4453996718,-0.3047458609  
 C,0,2.4384695876,-0.4660893621,-0.4648970269  
 C,0,0.5713614606,1.3514559213,0.4648249036  
 C,0,0.3106044134,2.8082866834,0.4304615209  
 H,0,-1.2257081945,-2.8334966282,-0.4129620748  
 H,0,-3.2397997686,-1.1997077416,0.1532658249  
 H,0,-2.3149389083,1.2681520089,0.4703800508  
 H,0,1.6179854489,-2.4885393444,-0.1134350915  
 H,0,3.4370089904,-0.825445189,-0.2148096234  
 H,0,2.062463577,0.4430463497,0.2080168172  
 H,0,2.45039544,0.0195633005,-1.443786966  
 H,0,0.5573117211,3.2783134604,1.387874045  
 H,0,1.0013611683,3.2543741028,-0.2984829863  
 H,0,-0.7088146983,3.09080071,0.1239233599

**Structure 16, model starting material, RB3LYP/6-31G(d,p)**

E(RB+HF-LYP) = -348.861795569

|                                            |                             |
|--------------------------------------------|-----------------------------|
| Zero-point correction=                     | 0.156101 (Hartree/Particle) |
| Thermal correction to Energy=              | 0.166967                    |
| Thermal correction to Enthalpy=            | 0.167911                    |
| Thermal correction to Gibbs Free Energy=   | 0.118081                    |
| Sum of electronic and zero-point Energies= | -348.705694                 |



Sum of electronic and thermal Energies= -348.694829  
 Sum of electronic and thermal Enthalpies= -348.693885  
 Sum of electronic and thermal Free Energies= -348.743715

|       | E (Thermal)<br>KCal/Mol | CV<br>Cal/Mol-Kelvin | S<br>Cal/Mol-Kelvin |
|-------|-------------------------|----------------------|---------------------|
| Total | 104.773                 | 36.822               | 104.876             |

C,0,0.9661510184,1.8546017229,0.0570704995  
 C,0,1.4590101121,0.7554552784,-0.0982281019  
 C,0,2.1178400908,-0.4834450762,-0.2897890846  
 C,0,1.5684315816,-1.7198808576,-0.2212882687  
 C,0,0.1877843851,-2.1086979062,0.0549435574  
 C,0,-0.8550537921,-1.3361583835,0.3001033955  
 C,0,-1.9363203435,-0.6456745414,0.5464162988  
 C,0,-2.8961624079,-0.13276704,-0.5017216913  
 C,0,0.3367796297,3.1533788481,0.258061757  
 H,0,0.0063421084,-3.1848160398,0.0545775224  
 H,0,2.2410485342,-2.5561127621,-0.3962846709  
 H,0,3.1818424553,-0.4229663003,-0.5140390799  
 H,0,-2.1675467075,-0.3960204545,1.5841577628  
 H,0,-3.9096141615,-0.5095818264,-0.318675363  
 H,0,-2.5886088057,-0.4379228056,-1.504127474  
 H,0,-2.9495918981,0.9622800847,-0.47676273  
 H,0,0.920512571,3.7775548978,0.944671954  
 H,0,0.2439277453,3.7024005398,-0.6865196952  
 H,0,-0.6690734864,3.0443123992,0.6795916041

### Structure 17 (model ene transition structure), RB3LYP/6-31G(d,p)

E(RB+HF-LYP) = -348.812684887

|                                              |                             |
|----------------------------------------------|-----------------------------|
| Zero-point correction=                       | 0.153791 (Hartree/Particle) |
| Thermal correction to Energy=                | 0.162837                    |
| Thermal correction to Enthalpy=              | 0.163781                    |
| Thermal correction to Gibbs Free Energy=     | 0.120042                    |
| Sum of electronic and zero-point Energies=   | -348.658894                 |
| Sum of electronic and thermal Energies=      | -348.649848                 |
| Sum of electronic and thermal Enthalpies=    | -348.648904                 |
| Sum of electronic and thermal Free Energies= | -348.692643                 |

|       | E (Thermal)<br>KCAL/MOL | CV<br>CAL/MOL-KELVIN | S<br>CAL/MOL-KELVIN |
|-------|-------------------------|----------------------|---------------------|
| TOTAL | 102.182                 | 33.827               | 92.056              |

C,0,0.4539496138,1.4937090858,-0.0693590327  
 C,0,-0.4766072033,0.6383713208,-0.0608461424  
 C,0,-1.8989033147,0.4386430987,-0.1786087458  
 C,0,-2.3226402213,-0.8478280246,-0.0971657478  
 C,0,-1.2524416472,-1.7966146943,0.10399546  
 C,0,-0.012545594,-1.2796184474,-0.0155559871  
 C,0,1.2996207544,-1.5113845319,-0.2557799979  
 C,0,2.3191520257,-0.617296787,0.2815178674  
 C,0,1.0079045446,2.8354327688,0.1594650208  
 H,0,-1.4316731297,-2.8112593931,0.4471085725  
 H,0,-3.3663093723,-1.1397673272,-0.1336212421  
 H,0,-2.5497658398,1.2902459635,-0.3450349491  
 H,0,1.5587302972,-2.1462950955,-1.1044843055

H,0,3.326080259,-0.7906214259,-0.1013349977  
 H,0,2.3323476215,-0.5384508791,1.3722883984  
 H,0,1.9268851637,0.427344814,-0.0436335025  
 H,0,1.6901100908,3.1411363625,-0.6420402909  
 H,0,0.2211659171,3.5970225923,0.2538240639  
 H,0,1.5874952447,2.8501616553,1.0909520859

### Structure 18 (model ene product), RB3LYP/6-31G(d,p)

E(RB+HF-LYP) = -348.927950138

|                                              |                             |
|----------------------------------------------|-----------------------------|
| Zero-point correction=                       | 0.159698 (Hartree/Particle) |
| Thermal correction to Energy=                | 0.168459                    |
| Thermal correction to Enthalpy=              | 0.169403                    |
| Thermal correction to Gibbs Free Energy=     | 0.126294                    |
| Sum of electronic and zero-point Energies=   | -348.768252                 |
| Sum of electronic and thermal Energies=      | -348.759491                 |
| Sum of electronic and thermal Enthalpies=    | -348.758547                 |
| Sum of electronic and thermal Free Energies= | -348.801656                 |

|       | E (Thermal) | CV             | S              |
|-------|-------------|----------------|----------------|
|       | KCal/Mol    | Cal/Mol-Kelvin | Cal/Mol-Kelvin |
| Total | 105.710     | 33.116         | 90.732         |

C,0,0.2701615542,-0.9534167569,-0.1078577717  
 C,0,-0.352342424,0.3930029269,0.0422734119  
 C,0,-1.7832053736,0.1590236053,0.2811809745  
 C,0,-2.0087408506,-1.1786099252,0.2182411  
 C,0,-0.747273105,-1.8645555023,-0.0306560251  
 C,0,0.2541507156,1.5831189333,-0.1581296703  
 C,0,1.6747206917,-1.2960542882,-0.2788368002  
 C,0,2.7552817948,-0.59608239,0.1038077444  
 C,0,-0.3773893074,2.9351515796,-0.05547329  
 H,0,-0.6326536184,-2.9398494947,-0.1104616209  
 H,0,-2.9672822669,-1.6723250243,0.3273966526  
 H,0,-2.5252898079,0.9327193281,0.4241903306  
 H,0,1.8435594641,-2.2684560039,-0.7426599309  
 H,0,3.7550705652,-0.9767946673,-0.0779816091  
 H,0,2.684963759,0.3464126204,0.6355608163  
 H,0,1.3035113893,1.5766670307,-0.4431480303  
 H,0,0.1669416417,3.5556625889,0.6679338178  
 H,0,-0.3163913809,3.461285602,-1.0168998848  
 H,0,-1.4246119192,2.8952089254,0.2487714181

### Structure 19 (model diradical), UB3LYP/6-31G(d,p)

E(UB+HF-LYP) = -348.848502980

|                                              |                             |
|----------------------------------------------|-----------------------------|
| Zero-point correction=                       | 0.155361 (Hartree/Particle) |
| Thermal correction to Energy=                | 0.165133                    |
| Thermal correction to Enthalpy=              | 0.166077                    |
| Thermal correction to Gibbs Free Energy=     | 0.119877                    |
| Sum of electronic and zero-point Energies=   | -348.693142                 |
| Sum of electronic and thermal Energies=      | -348.683370                 |
| Sum of electronic and thermal Enthalpies=    | -348.682426                 |
| Sum of electronic and thermal Free Energies= | -348.728626                 |

| E (Thermal) | CV | S |
|-------------|----|---|
|-------------|----|---|

|       | KCAL/MOL | CAL/MOL-KELVIN | CAL/MOL-KELVIN |
|-------|----------|----------------|----------------|
| TOTAL | 103.623  | 35.016         | 97.237         |

C,0,-0.9839280925,0.187032233,0.0133701387  
 C,0,0.408509799,-0.3857545424,-0.0074348178  
 C,0,0.2391546425,-1.8459343302,-0.0226072815  
 C,0,-1.114202411,-2.1361613716,-0.0063751248  
 C,0,-1.8668907767,-0.9451465068,0.021711305  
 C,0,1.5658448717,0.2702165938,-0.0246175467  
 C,0,-1.3708481904,1.4965563808,0.0117053482  
 C,0,-0.4827080916,2.6987041198,0.0046152179  
 C,0,3.0084099147,-0.0018178809,-0.0009335658  
 H,0,-2.9475658179,-0.8755322113,0.0453562633  
 H,0,-1.5351534425,-3.1354843146,-0.0110033136  
 H,0,1.0557477557,-2.5554001661,-0.0469606608  
 H,0,-2.4436829076,1.6876483305,0.023003125  
 H,0,-0.8271755619,3.4383568807,-0.728953667  
 H,0,0.5534009951,2.4329048967,-0.2246460448  
 H,0,-0.4871948635,3.2040170938,0.9814417043  
 H,0,3.4842467289,0.4570017086,0.8752085266  
 H,0,3.216659228,-1.0830495228,0.0382119332  
 H,0,3.510667891,0.4033691316,-0.8882599058

### ***Restricted Analog of Structure 19 (model diradical), B3LYP/6-31G(d,p)***

E(RB+HF-LYP) = -348.840668506

|                                              |                             |
|----------------------------------------------|-----------------------------|
| Zero-point correction=                       | 0.156793 (Hartree/Particle) |
| Thermal correction to Energy=                | 0.165719                    |
| Thermal correction to Enthalpy=              | 0.166663                    |
| Thermal correction to Gibbs Free Energy=     | 0.123430                    |
| Sum of electronic and zero-point Energies=   | -348.683875                 |
| Sum of electronic and thermal Energies=      | -348.674950                 |
| Sum of electronic and thermal Enthalpies=    | -348.674005                 |
| Sum of electronic and thermal Free Energies= | -348.717238                 |

|       | E (Thermal) | CV             | S              |
|-------|-------------|----------------|----------------|
|       | KCal/Mol    | Cal/Mol-Kelvin | Cal/Mol-Kelvin |
| Total | 103.990     | 33.748         | 90.992         |

C,0,0.9622377549,0.2454895298,0.0647129575  
 C,0,-0.5306636057,0.116813131,0.0153603049  
 C,0,-1.0197313265,1.4406165284,0.0224928453  
 C,0,0.0664379085,2.3619187505,0.072335282  
 C,0,1.2497667135,1.6596102576,0.1370155236  
 C,0,-1.247932183,-1.0189648961,-0.3457753326  
 C,0,1.8891122279,-0.7445315477,-0.0173577829  
 C,0,1.5871956705,-2.199789585,-0.0488161542  
 C,0,-2.6846341017,-1.109478499,0.0190407695  
 H,0,2.2415662327,2.0791737088,0.2594405772  
 H,0,-0.0334942251,3.4408861896,0.0880107717  
 H,0,-2.0615577033,1.7152458113,-0.0879785532  
 H,0,2.9338257698,-0.4410778295,-0.0955715152  
 H,0,2.3362933273,-2.7563618342,-0.620748273  
 H,0,0.5670374184,-2.3418938618,-0.4508015185  
 H,0,1.5787799882,-2.6172782861,0.9676331322  
 H,0,-2.7468036084,-1.8883703479,0.7961431053  
 H,0,-3.1591385369,-0.2048641091,0.441665882

H,0,-3.2872430141,-1.4955614589,-0.8118440863

### Structure 20 (model ts from diradical to product), UB3LYP/6-31G(d,p)

E(UB+HF-LYP) = -348.839347701

|                                              |                             |
|----------------------------------------------|-----------------------------|
| Zero-point correction=                       | 0.152779 (Hartree/Particle) |
| Thermal correction to Energy=                | 0.161096                    |
| Thermal correction to Enthalpy=              | 0.162040                    |
| Thermal correction to Gibbs Free Energy=     | 0.120140                    |
| Sum of electronic and zero-point Energies=   | -348.686569                 |
| Sum of electronic and thermal Energies=      | -348.678252                 |
| Sum of electronic and thermal Enthalpies=    | -348.677308                 |
| Sum of electronic and thermal Free Energies= | -348.719207                 |

|       | E (Thermal) | CV             | S              |
|-------|-------------|----------------|----------------|
|       | KCal/Mol    | Cal/Mol-Kelvin | Cal/Mol-Kelvin |
| Total | 101.089     | 32.402         | 88.186         |

C,0,-1.1368637199,-1.7928053866,-0.180862345  
 C,0,0.0625177131,-1.0458465035,-0.2036667658  
 C,0,-0.3207285332,0.3881362826,0.0417856386  
 C,0,-1.7580999929,0.3895662408,0.1837879081  
 C,0,-2.2168265405,-0.9194408291,0.0710116279  
 C,0,1.3823498144,-1.4384360198,-0.2895368141  
 C,0,2.4245238856,-0.4359756494,-0.4481301859  
 C,0,0.5658130437,1.3488216903,0.387505896  
 C,0,0.3738409908,2.8165785856,0.4344806493  
 H,0,-1.216651969,-2.8543929907,-0.3822181046  
 H,0,-3.2543177389,-1.2246712238,0.1478765452  
 H,0,-2.3537642667,1.2565251045,0.4397118259  
 H,0,1.6436967434,-2.4764573839,-0.0877376192  
 H,0,3.4290854404,-0.7583474308,-0.166456207  
 H,0,1.9914955106,0.4953813284,0.2011080923  
 H,0,2.4473593134,0.0419122482,-1.4328792675  
 H,0,0.6909930058,3.2307321681,1.3989861349  
 H,0,1.0202712925,3.2855100115,-0.3207269586  
 H,0,-0.657327298,3.1402177027,0.2240819036

### Restricted Analog of Structure 20 (model ts from diradical to product), B3LYP/6-31G(d,p)

E(RB+HF-LYP) = -348.838360073

|                                              |                             |
|----------------------------------------------|-----------------------------|
| Zero-point correction=                       | 0.154578 (Hartree/Particle) |
| Thermal correction to Energy=                | 0.162610                    |
| Thermal correction to Enthalpy=              | 0.163554                    |
| Thermal correction to Gibbs Free Energy=     | 0.122229                    |
| Sum of electronic and zero-point Energies=   | -348.683782                 |
| Sum of electronic and thermal Energies=      | -348.675750                 |
| Sum of electronic and thermal Enthalpies=    | -348.674806                 |
| Sum of electronic and thermal Free Energies= | -348.716131                 |

|       | E (Thermal) | CV             | S              |
|-------|-------------|----------------|----------------|
|       | KCal/Mol    | Cal/Mol-Kelvin | Cal/Mol-Kelvin |
| Total | 102.039     | 31.541         | 86.974         |

|    |   |   |           |           |           |
|----|---|---|-----------|-----------|-----------|
| 1  | 6 | 0 | -2.120511 | 0.030200  | 0.010859  |
| 2  | 6 | 0 | -0.841658 | 0.642117  | 0.028061  |
| 3  | 6 | 0 | 0.169340  | -0.473276 | 0.057874  |
| 4  | 6 | 0 | -0.592383 | -1.681706 | 0.055563  |
| 5  | 6 | 0 | -1.957562 | -1.360037 | 0.002574  |
| 6  | 6 | 0 | -0.475460 | 1.962073  | -0.085896 |
| 7  | 6 | 0 | 0.911796  | 2.361246  | 0.114926  |
| 8  | 6 | 0 | 1.483434  | -0.320525 | -0.282004 |
| 9  | 6 | 0 | 2.540863  | -1.314674 | 0.024307  |
| 10 | 1 | 0 | -3.065475 | 0.557708  | 0.065565  |
| 11 | 1 | 0 | -2.765995 | -2.082000 | -0.018037 |
| 12 | 1 | 0 | -0.173183 | -2.677096 | -0.020655 |
| 13 | 1 | 0 | -1.203143 | 2.681009  | -0.461547 |
| 14 | 1 | 0 | 1.172212  | 3.336310  | -0.301942 |
| 15 | 1 | 0 | 1.520422  | 1.449167  | -0.343049 |
| 16 | 1 | 0 | 1.238850  | 2.307616  | 1.158454  |
| 17 | 1 | 0 | 3.164282  | -1.517432 | -0.854601 |
| 18 | 1 | 0 | 3.219241  | -0.862250 | 0.762986  |
| 19 | 1 | 0 | 2.185635  | -2.265545 | 0.455243  |

**Full System Energies, (U)B3LYP/6-31G\*\***

|                                                   | Potential E  | zpe      | E + zpe      | Erel  | Free Energy<br>estimate 25 °C | Grel  |
|---------------------------------------------------|--------------|----------|--------------|-------|-------------------------------|-------|
| Starting Material                                 | -1508.472769 | 0.421576 | -1508.051192 | 0.0   | -1508.116872                  | 0.0   |
| Ene TS                                            | -1508.432928 | 0.419670 | -1508.013257 | 23.8  | -1508.077000                  | 25.0  |
| Product                                           | -1508.520603 | 0.424179 | -1508.096424 | -28.4 | -1508.159056                  | -26.5 |
| diradical                                         | -1508.448106 | 0.422109 | -1508.025997 | 15.8  | -1508.088901                  | 17.6  |
| TS from diradical<br>to product                   | -1508.442069 | 0.419118 | -1508.022952 | 17.7  | -1508.082968                  | 21.3  |
| reversed diradical<br>ts to reversed<br>diradical | -1508.442362 | 0.421634 | -1508.02073  | 19.1  | -1508.08428                   | 20.5  |
|                                                   | -1508.418567 | 0.419274 | -1507.99929  | 32.6  | -1508.06353                   | 33.5  |

**Model System Energies**

|                          | Potential E  | zpe      | E + zpe        | Erel  | Free En<br>estimate<br>298 | Grel  |
|--------------------------|--------------|----------|----------------|-------|----------------------------|-------|
| <b>B3LYP / 6-31G**</b>   |              |          |                |       |                            |       |
| Starting Material        | -348.8617956 | 0.156101 | -348.706       | 0.0   | -348.74372                 | 0.0   |
| Transition State         | -348.8126849 | 0.153791 | -348.659       | 29.4  | -348.69264                 | 32.0  |
| Product                  | -348.9279501 | 0.159698 | -348.768       | -39.3 | -348.80166                 | -36.4 |
| Biradical                | -348.848503  | 0.155361 | -348.693       | 7.9   | -348.72863                 | 9.5   |
| TS from Birad to prod    | -348.8393477 | 0.152779 | -348.687       | 12.0  | -348.71921                 | 15.4  |
| carbene (restricted)     | -348.8406685 | 0.156793 | -348.684       | 13.7  | -348.71724                 | 16.6  |
| carbene ts               | -348.8383601 | 0.154578 | -348.684       | 13.7  | -348.71613                 | 17.3  |
| <b>B3LYP / 6-311+G**</b> |              |          |                |       |                            |       |
| Starting Material        | -348.9449781 | 0.155074 | -348.79        | 0.0   | -348.82832                 | 0.0   |
| Transition State         | -348.8914411 | 0.152374 | -348.739       | 31.9  | -348.77287                 | 34.8  |
| Product                  | -349.0057555 | 0.158554 | -348.847       | -36.0 | -348.88072                 | -32.9 |
| Biradical                | -348.9245836 | 0.154228 | -348.77        | 12.3  | -348.80544                 | 14.4  |
| TS from Birad to prod    | -348.915179  | 0.151613 | -348.764       | 16.5  | -348.7963                  | 20.1  |
| carbene (restricted)     | -348.9180463 | 0.155646 | -348.762       | 17.3  | -348.79601                 | 20.3  |
| carbene ts               | -348.9145037 | 0.153204 | -348.761       | 17.9  | -348.79374                 | 21.7  |
| <b>BD(T)/6-31+G**</b>    |              |          |                |       |                            |       |
|                          |              |          | BD(T) +<br>zpe |       |                            |       |
| Starting Material        | -347.85666   | 0.155074 | -347.70159     | 0.0   |                            |       |
| Transition State         | -347.80729   | 0.152374 | -347.65491     | 29.3  |                            |       |
| Product                  | -347.93029   | 0.158554 | -347.77173     | -44.0 |                            |       |
| Biradical                | -347.82238   | 0.154228 | -347.66816     | 21.0  |                            |       |
| carbene (restricted)     | -347.83613   | 0.155646 | -347.68049     | 13.2  |                            |       |
| carbene ts               | -347.83112   | 0.153204 | -347.67792     | 14.9  |                            |       |
| Biradical for Ubrk       | -347.84019   | 0.154228 | -347.68596     | 9.8   |                            |       |
| TS from Birad to prod    | -347.8313    | 0.151613 | -347.67969     | 13.7  |                            |       |
